# 1 **Decoding and perturbing decision states in real time**

2 *Diogo Peixoto*<sup>1,2\*</sup>, *Jessica R. Verhein*<sup>3,4\*</sup>, *Roosbeh Kiani*<sup>5</sup>, *Jonathan C. Kao*<sup>6,7,8</sup>, *Paul*  
3 *Nuyujukian*<sup>3,6,9,10,15,16</sup>, *Chandramouli Chandrasekaran*<sup>6,11,12,13</sup>, *Julian Brown*<sup>11</sup>, *Sania Fong*<sup>11</sup>,  
4 *Stephen I. Ryu*<sup>6,14</sup>, *Krishna V. Shenoy*<sup>1,6,9,11,15,16</sup>, *William T. Newsome*<sup>1,11,15,16</sup>

5 1 Neurobiology Department, Stanford University, Stanford, CA 94305

6 2 Champalimaud Neuroscience Programme, Lisbon, Portugal, 1400-038

7 3 Neurosciences Graduate Program, Stanford University, Stanford, CA 94305

8 4 Medical Scientist Training Program, Stanford University School of Medicine, Stanford, CA  
9 94305

10 5 Center for Neural Science, New York University, New York, NY 10003

11 6 Electrical Engineering Department, Stanford University, Stanford, CA 94305

12 7 Department of Electrical and Computer Engineering, University of California, Los Angeles, CA  
13 90095

14 8 Neurosciences Program, University of California, Los Angeles, CA 90095

15 9 Bioengineering Department, Stanford University, Stanford, CA 94305

16 10 Neurosurgery Department, Stanford University, Stanford, CA 94305

17 11 Howard Hughes Medical Institute, Stanford University, CA 94305

18 12 Department of Psychological and Brain Sciences, Boston University, Boston, MA 02215

19 13 Department of Anatomy and Neurobiology, Boston University School of Medicine, Boston,  
20 MA 02118

21 14 Neurosurgery Department, Palo Alto Medical Foundation, Palo Alto, CA 94301

22 15 Wu Tsai Neurosciences Institute, Stanford University, Stanford, CA 94305

23 16 Bio-X Institute, Stanford University, Stanford, CA 94305

24 \* Denotes equal contribution.

25 Please address correspondence to Bill Newsome ([bnewsome@stanford.edu](mailto:bnewsome@stanford.edu)), Diogo Peixoto  
26 ([dpeixoto@stanford.edu](mailto:dpeixoto@stanford.edu)) or Jessica Verhein ([jverhein@stanford.edu](mailto:jverhein@stanford.edu)).

27

## 28 **Summary**

29 In dynamic environments, subjects often integrate multiple samples of a signal and combine them  
30 to reach a categorical judgment. The process of deliberation on the evidence can be described by  
31 a time-varying decision variable (DV), decoded from neural activity, that predicts a subject's  
32 decision at the end of a trial. However, within trials, large moment-to-moment fluctuations of the  
33 DV are observed. The behavioral significance of these fluctuations and their role in the decision  
34 process remain unclear. Here we show that within-trial DV fluctuations decoded in real time from  
35 motor cortex are tightly linked to choice behavior, and that robust changes in DV sign have the  
36 statistical regularities expected from behavioral studies of changes-of-mind. Furthermore, we find  
37 single-trial evidence for absorbing decision bounds. As the DV builds up, heavily favoring one or  
38 the other choice, moment-to-moment variability in the DV is reduced, and both neural DV and  
39 behavioral decisions become resistant to additional pulses of sensory evidence as predicted by  
40 diffusion-to-bound and attractor models of the decision process.

41

42

43

44 When making a categorical decision about a noisy stimulus, it is common to fluctuate between  
45 levels of commitment to a choice before reporting a decision. In some instances the fluctuations  
46 are sufficiently strong to lead to a “change of mind” (CoM) while deliberating<sup>1-6</sup> or even while the  
47 reporting action is being executed<sup>7</sup>. Because these within-trial fluctuations are different from trial  
48 to trial and not necessarily tied to an external event or stimulus feature, they can only be captured  
49 using a moment-to-moment neural readout of the decision state on single trials.

50 To obtain this readout, we decoded a decision variable (DV) from neural population activity in  
51 PMd and M1 in real time to continuously estimate the decision state while two monkeys performed  
52 a motion discrimination task<sup>8,9</sup> (Fig. 1a, see Methods). The DV was estimated by applying a linear  
53 decoder, trained on data from a previous experimental session, to spiking data (from 96 to 192  
54 electrodes) from the preceding 50 ms, updated every 10 ms throughout each trial (Fig. 1b, see  
55 Methods). The sign of the DV indicated which choice was predicted by the decoder, which allowed  
56 us to calculate the decoder’s prediction accuracy. The DV magnitude reflected the confidence of  
57 the model’s prediction in units of log-odds for one vs. the other decision (see Methods). Note that  
58 the decision variable as defined here encompasses all choice predictive signals that can be decoded  
59 from neural activity<sup>10</sup>, including but not limited to moment-to-moment value of accumulated  
60 evidence as posited in classical sequential sampling models.

61 We have previously demonstrated with offline analysis that this decision variable (DV) can predict  
62 choices on single trials up to seconds before initiation of the operant response, and that the  
63 accuracy of these predictions increases on average throughout the course of the trial<sup>10</sup>.

64 Here, we employed closed-loop, neurally-contingent control over stimulus timing to directly probe  
65 the relationship of within-trial DV fluctuations to behaviorally meaningful decision states. For the

66 first time, we quantified the behavioral effects of previously covert DV variations (i) as a function  
67 of time and for different virtual DV boundaries imposed during the trial, (ii) when large, CoM-like  
68 fluctuations were detected during deliberation on noisy visual evidence, and (iii) when  
69 subthreshold stimulus pulses were added during the trial.

70 Having a nearly instantaneous real-time estimate of the decision state read-out enabled us to  
71 terminate the visual stimulus based on the current value (or history) of the DV and validate the  
72 behavioral relevance of DV fluctuations using the monkey's behavioral reports following stimulus  
73 termination.

#### 74 **Decisions on perceived stimulus motion can be reliably decoded in real time based on 50 ms** 75 **of PMd/M1 neural activity**

76  
77 Two monkeys performed a variable duration variant of the classical random dot motion  
78 discrimination task using an arm movement as the operant response<sup>10</sup>. As expected, the subjects  
79 performed better for higher coherence and longer duration stimuli and reached almost perfect  
80 performance for the easiest stimuli (Extended Data Fig. 1).

81 We first measured the accuracy of our real-time decoder in predicting the monkeys' behavioral  
82 choices as a function of time during the trial. As in our previous offline results<sup>10</sup>, average prediction  
83 accuracy started at chance levels during the targets epoch (Fig. 1c, Extended Data Fig. 2a). During  
84 the dots presentation average prediction accuracy quickly departed from baseline ( $174.5 \text{ ms} \pm 18.8$   
85 and  $214.5 \text{ ms} \pm 8.09 \text{ ms}$  after dots onset for monkey H and F, respectively), rising monotonically  
86 for the rest of the epoch. The rise in prediction accuracy was steep, reaching 99% (98%) correct  
87 for the longest stimuli presentations for monkey H (F), respectively. Moreover, for all 4 epochs

88 considered (targets, dots, delay and post-go) the average accuracy difference between our real-  
89 time readout and the equivalent one calculated offline (trained using data from the same session)  
90 was within a  $\pm 2\%$  range (Extended Data Fig. 3a-d). Thus, our real-time choice decoder reproduces  
91 prediction accuracy as reported in previous off-line analyses of decision-related neural activity in  
92 both the oculomotor and somatomotor systems<sup>1,10</sup>.

93 Our real-time decoder also reproduced the temporal dynamics and coherence dependence of the  
94 DV, as reported in previous off-line studies<sup>1,10</sup>. The on-line DV: (i) started around 0 at the time of  
95 dots onset, (ii) separated by choice after  $\sim 200$  ms, and (iii) rose (or fell) faster for easier trials (Fig.  
96 1d, Extended Data Fig. 2b; regression of DV onto coherence significant for both choices,  $p < 10^{-5}$   
97 uncorrected). Prediction accuracy was higher for correct trials compared to error trials (Extended  
98 Data Fig. 4) when holding the stimulus coherence constant, as expected from previous studies<sup>11</sup>.

99 Finally, our decoding method yielded stable performance across multiple days, justifying  
100 combination of data across sessions (Extended Data Fig. 5). This is particularly important when  
101 studying rare events such as CoMs, which only happen on a small fraction of the trials and could  
102 not be characterized adequately using a single session's data.

### 103 **Real time DV closely predicts choice likelihood across experimental conditions**

104 The previous results are a proof of concept for a highly reliable, real-time readout of decision state  
105 in PMd/M1 using spiking data from  $\sim 100$ -200 units and aggregate and average metrics (Fig. 1c-  
106 d, Extended Data Fig. 2a-b). However, we often observed large fluctuations (over 3 natural log  
107 units) in the decision variable on individual trials, even within single behavioral epochs (Fig. 1e).  
108 If moment-to-moment fluctuations in DV during single trials (as estimated by our decoder) reflect  
109 true fluctuations in the decision state of the animal, we expect larger absolute values of DV to be

110 associated with stronger preference for one of the two choices, and hence higher prediction  
111 accuracy were a decision to be required at any time during a single trial.

112 Because we decoded and tracked the DV in real-time, we were able to terminate the visual stimulus  
113 in a neurally contingent manner and probe both neural activity and the subject's behavior with  
114 high precision and negligible latency (<34 ms, see Methods). Inspired by sequential sampling  
115 behavioral models that assume a bound<sup>12-14</sup>, the first closed-loop test we performed was to impose  
116 virtual decision boundaries that, if reached, would result in stimulus termination (Fig. 2a),  
117 prompting the subject to immediately report its decision (in trials with no delay period). In this  
118 manner we obtained a direct mapping between the nearly instantaneous readout of decision state  
119 and the likelihood of a given behavioral choice.

120 Figure 2b shows 22 example DV traces from trials that led to stimulus termination by reaching a  
121 fixed DV boundary of magnitude 3, within a tolerance of  $\pm 0.25$  DV units.

122 To characterize the relationship between the DV at termination and prediction accuracy, we  
123 systematically swept the parameter space for the boundary height using values spanning 0.5-5 DV  
124 units in 0.5 increments (1DV unit corresponds to an increase of 2.718 in the likelihood ratio of  
125 choosing one target over the other). Figure 2c shows that prediction accuracy increases  
126 monotonically with the DV magnitude at termination as expected. Moreover, using only 100 ms  
127 of data to estimate the DV that triggered termination, the difference between the observed  
128 likelihood of a given choice (solid trace) and that predicted by the logistic function (dashed trace)  
129 was only, on average, 1.7% (1.9%) for monkey H (F) (Fig. 2c, Extended Data Fig. 2c). For  
130 example, neural DV values of  $\pm 3$  predict decisions upon termination with an accuracy of 98%.  
131 Even DV values as low as  $\pm 0.5-1$  predict decisions with an accuracy of nearly 70%. DV

132 fluctuations below  $\pm 0.5$  are more susceptible to noise in our estimates of decision state and at most  
133 are associated with very weak choice preferences and were thus not tested. Overall, these results  
134 show that moment-by-moment fluctuations in PMd/M1 neural population activity captured by our  
135 decoding model are indeed reflective of a fluctuating internal decision state of the animal—  
136 fluctuations that have been covert and thus uninterpretable until now.

137 Figure 2c (Extended Data Fig. 2c) combines trials across a wide range of coherences and stimulus  
138 durations, aggregated across 17 (15) sessions from monkey H (F). To identify experimental factors  
139 that might influence the observed relationship between DV at termination and prediction accuracy,  
140 we first resorted the same trials in Figure 3c by stimulus coherence. The results show that there is  
141 a small separation between the curves for high and low coherence trials (Fig. 2d) with higher  
142 accuracy for high coherence trials. The shift is small but reliable across monkeys (Extended Data  
143 Fig. 2d). We hypothesized that this difference resulted from motion energy signals already en route  
144 from the retina to PMd/M1 ( $\sim 175$  ms latency) when the DV reached stimulus termination. More  
145 motion energy signals would be arriving from this neural ‘pipeline’ on high coherence trials,  
146 leading to a slightly higher DV than we measured at stimulus termination.

147 To assess this possibility, we measured the derivative of the DV around termination and performed  
148 the following two analyses. First we checked whether DV derivative explained a significant  
149 fraction of choice variance beyond DV value alone (see Methods). For both monkeys the effect of  
150 DV derivative (defined as the DV slope in the last 50 ms of stimulus presentation) was significant  
151 ( $p=0.02$ ,  $p = 4.5 \times 10^{-11}$  for monkey H and F, respectively) and the effect was congruent with our  
152 hypothesis: stronger positive derivatives predicted higher likelihood of rightward choices and  
153 stronger negative derivatives predicted higher likelihood of leftward choices (Extended Data Table  
154 1, “DV diff”). Second, we tested whether high coherence trials were associated with higher DV

155 derivatives at termination by performing linear regression of DV derivatives as a function of signed  
156 coherence. For both monkeys signed coherence was strongly predictive of DV slopes:  $p = 2.17$   
157  $\times 10^{-171}$  and  $R^2 = 0.23$  for monkey H and  $p = 1.57 \times 10^{-105}$  and  $R^2 = 0.16$  for monkey F. These results  
158 confirm that DV derivative is predictive of choice beyond DV alone and show that higher  
159 coherence trials are associated with higher DV derivatives. The data are consistent with our  
160 hypothesis above that the DV continues to evolve under the influence of ‘pipeline’ sensory  
161 information for a short interval following stimulus termination, resulting in somewhat better  
162 prediction accuracy than expected from the DV at termination, especially at high coherences.

163 Sorting trials by duration (Fig. 2e, Extended Data Fig. 2e), reveals a different effect: the centers of  
164 the quantiles are strongly shifted to the right (higher DV magnitudes) for longer stimuli compared  
165 to shorter stimuli. This effect is expected from multiple sequential sampling models<sup>8,15-17</sup>. In drift  
166 diffusion models, for example, diffusion to high decision bounds requires more time than for low  
167 bounds<sup>18</sup>. However, we tested whether stimulus duration *per se* was a significant predictor of  
168 choice independently of DV value by including two additional regressors in our logistic model of  
169 choice: stimulus duration (representing choice bias as a function of time) and an interaction term  
170 between stimulus duration and direction (representing increased sensitivity to stimulus coherence  
171 as function of time). Neither regressor was significant for either monkey ( $p > 0.05$ , Extended Data  
172 Table 1), implying that the likelihood of making one or the other choice depended on DV value  
173 independently of the time required to reach that value.

174 Together, these results show that fluctuations in DV magnitude at a 100 ms time scale have a  
175 predictable correlate in choice likelihood that is lawfully influenced by stimulus coherence and  
176 robust across time. We emphasize that our decoded DV is model-based and thus a proxy for the  
177 actual decision state in the brain. We are sampling from a relatively small number of neurons, and



178 the underlying mechanism is unlikely to be strictly linear (in contrast to the logistic model). In  
179 addition, we do not know with certainty when the deliberation process ends within the brain, which  
180 could occur before or after our stimulus termination on individual trials. Despite these caveats, our  
181 ability to predict choice likelihood using a DV boundary criterion at stimulus termination within a  
182 very small margin of error (<2% on average) confirms that DV is a reliable proxy for decision  
183 state.

184 **Neurally detected CoMs can be validated and match the statistical regularities expected from**  
185 **previous studies**

186 The mapping between DV and choice likelihood obtained in the first experiment (Fig. 2c), enabled  
187 us to perform a new closed-loop experiment aimed at capturing particularly robust DV fluctuations  
188 in which the sign of the DV (and thus the neurally inferred decision state of the animal) changed  
189 in the middle of a trial, suggestive of a ‘change of mind’ at the behavioral level (CoM, Fig. 3a-b).  
190 When the neural criteria for a CoM were met in real-time (see Methods, examples in Figure 4a,  
191 orange and green arrows), the stimulus was terminated instructing the monkey to make a decision  
192 as described above. Our aim was to detect neurally-based candidate CoMs, assess the influence  
193 of the decision states before and after the CoM on the final choice, and determine whether  
194 statistical properties of the neurally derived CoMs match the properties expected of CoMs from  
195 prior psychophysical and neurophysiological studies.

196 We conceptually divide a CoM trial into two segments—the initial preference prior to the DV sign  
197 change, and the final (opposite) preference that leads to the observed choice. The observed choices  
198 allow corroboration of the neural estimate of the final decision state in the second segment  
199 (Extended Data Fig. 6). For monkey F, the relationship between choice prediction accuracy and

200 DV at stimulus termination for CoM trials was very similar to that of non-CoM trials (compare  
201 Extended Data Fig. 2c and Extended Data Fig. 6b, mean error between predicted and observed  
202 choice likelihood: 1.9% for non-CoM trials vs 3.8% for CoM trials). This relationship was lawful  
203 and monotonic for monkey H as well although lower than expected (Extended Data Fig. 6a,  
204 compared to Fig. 2c, mean error between predicted and observed choice likelihood: 1.7% for non-  
205 CoM trials vs 9.3% for CoM trials), suggesting that in addition to the measured DV at stimulus  
206 termination, monkey H's decisions were also influenced by some aspect of the DV trajectory  
207 history specifically related to the CoM. We formally tested this hypothesis by regressing choice as  
208 a function of 3 additional parameters (in addition to DV at termination) that were enforced and  
209 monitored in this experiment (see Methods): maximum DV deflection before sign change and  
210 duration of sign stability before and after DV sign change. For monkey F, no additional factor was  
211 choice predictive, whereas for monkey H both the duration of sign stability before and after the  
212 CoM were also choice predictive (Extended Data Table 2) as suspected from Extended Data Fig.  
213 6.

214 We combined all 985 (1727) CoM's detected in monkey H (F) to assess whether our neurally  
215 detected CoMs conformed to three statistical regularities of CoMs established in previous  
216 psychophysical<sup>7</sup> and electrophysiological<sup>1</sup> studies.

217 The first observation is that CoMs are more frequent for low and intermediate coherence trials as  
218 opposed to high coherence trials, as high coherences are more likely to lead to straightforward  
219 integration of evidence toward the correct choice. We found the same to be true in our real-time  
220 detection data (Fig. 3c, Extended Data Fig. 2f; linear regression  $p < 0.001$ ).

221 The second observation is that CoMs are more likely to be corrective than erroneous. This  
222 prediction results from the corrective role of additional visual evidence on the initial preference of  
223 the subjects. This trend was also verified in the CoMs we detected with CoMs for non-zero  
224 coherences and for both monkeys being more likely corrective than erroneous (Fig. 3d, Extended  
225 Data Fig. 2g; Wilcoxon rank sum test  $p < 0.001$ , median corrective and erroneous CoM counts: 530  
226 and 242 for monkey H and 1046 and 443 for monkey F, respectively).

227

228 Finally, the third observation made in these previous studies was that CoMs were more frequent  
229 early in the trial than later in the trial, consistent with drift diffusion models in which the DV is  
230 more likely to have hit an absorbing decision bound as the trial progresses. We observed this effect  
231 in our real-time, neurally detected CoMs as well (Fig. 3e, Extended Data Fig. 2h).

232 We also discovered a new regularity associated with CoMs: the average time of zero crossing was  
233 negatively correlated with stimulus coherence (Fig. 3f, Extended Data Fig. 2i). This observation  
234 likely results from the stronger corrective effect of higher coherence stimuli (Fig. 3d, Extended  
235 Data Fig. 2g).

236 Together, these results show that robust fluctuations in DV that imply a change in choice  
237 preference (zero crossing) can be captured in real time and validated as changes of mind.

238 **Pulses of additional visual motion evidence have smaller neural and behavioral effects when**  
239 **presented at larger DV values**

240 In a final set of closed-loop experiments whether the neural and behavioral responses to brief  
241 pulses of additional motion information varied with the state of the DV before the pulse. Inspired  
242 by decision-making models involving buildup of neural activity to a bound<sup>15,16,19,20</sup>, we expected

243 termination of the deliberation process and commitment to a choice to be more likely at high DV  
244 values<sup>1,7,8,16,21</sup>. We therefore hypothesized that additional pulses of sensory evidence would result  
245 in less change in DV and behavior when pulses were triggered by high DV values.

246

247 To characterize the relationship between DV and responses to a stimulus pulse, we again imposed  
248 virtual DV boundaries (as in Fig. 3a-b) that, if reached, triggered a 200-ms pulse of additive dots  
249 coherence (randomly assigned to be rightward or leftward on each trial) followed by stimulus  
250 termination (Fig. 4a). We swept a subset of the previously used DV values for the boundary  
251 (spanning 1-4 DV units, in 1.0 increments). Pulse strength was calibrated to yield very small but  
252 significant effects on behavior, in an effort to avoid making the pulses so salient as to change the  
253 animals' integration strategy on pulse trials ( $\Delta$ coherence = 2% for monkey H, 4.5% for monkey  
254 F). Pulse information had no bearing on the reward<sup>8,17</sup>. Motion pulses slightly but significantly  
255 biased the monkeys' choices in the direction of the pulse ( $p = 8.38E-14$  for monkey H, Fig. 4b;  $p$   
256 =  $1.95E-4$  for monkey F, Extended Data Fig. 2j).

257

258 We reasoned that, to detect the presumably small effects of these small motion pulses on the DV,  
259 we would need to account for a processing delay for changing stimulus information to influence  
260 our recorded neural populations. Thus, to quantify the effect of the pulse on the evolving DV, we  
261 first measured the minimum latency for visual stimulus information to influence the DV: we  
262 calculated the time after stimulus onset at which the DV traces diverged for rightward vs. leftward  
263 choices in an independent set of open loop trials at the strongest motion coherence. We refer to  
264 this time point as the evidence representation latency (ERL). For each trial, we measured the  
265 change in DV ( $\Delta$ DV) for each time bin, beginning at the time of pulse onset plus the ERL (or

266 PERL—see Methods). We found that, on average, motion pulses slightly but significantly biased  
267  $\Delta DV$  in the direction of the pulse (Fig. 4c, Extended Data Fig. 2k).

268  
269 In the case of simple, unbounded linear integration, we expect the magnitude of DV change in  
270 response to a fixed motion pulse to remain constant regardless of the triggering DV at pulse onset.  
271 In contrast, Fig. 4d (Extended Data Fig. 2l) shows that motion pulses led to larger DV changes  
272 when triggered by low as compared to high DV values.

273  
274 Previous studies have shown that behavioral and LIP neural responses to similar motion pulses  
275 tend to be smaller when pulses are delivered later in the stimulus<sup>8,17</sup>. Large DV values tend to  
276 occur later in the trial, and this was hypothesized to be the underlying reason for the diminishing  
277 pulse effects (assuming some sort of bound on integration of evidence at larger DVs); but these  
278 studies lacked concurrent neural population recording and decoding and thus did not have access  
279 to the momentary decision state. Thus, the time of pulse onset is a possible confound for the  
280 decreasing pulse effects at high DV bound values as depicted in Fig 4d. To control for this  
281 possibility, we first used the slope of the  $\Delta DV$  vs. time relationship measured on individual trials  
282 ( $\Delta DV$  slope) to summarize the effect of the stimulus pulse on DV on single trials. We then  
283 performed a multiple regression analysis of  $\Delta DV$  slope that included both the triggering DV value  
284 and the time of the motion pulse as regressors (and other variables as well - see Methods). The  
285 regression data confirm that the effect of stimulus pulses on DV is only significant when triggered  
286 by lower DV values, and that this effect is not explained by pulse timing (Fig. 4e, Extended Data  
287 Fig. 2m, Supplementary Information Table 1). Similarly, the effect of motion pulses on  
288 psychophysical behavior is weaker when triggered by high DV values, and these effects also are

289 not explained by pulse timing (Fig. 4f, Extended Data Fig. 2n, Supplementary Information Table  
290 2).

291  
292 Our finding that larger DVs (and corresponding behavioral readouts) are more resistant to pulses  
293 is consistent with several models of decision formation, including linear integration to a decision  
294 bound (such as a simple stopping criterion<sup>12</sup>) or a more complex nonlinear integration  
295 process<sup>17,22,23</sup>. Inspired by these results, we returned to the data from the first two experiments in  
296 an attempt to explore the nature of the apparent bounding mechanism by analyzing the time-  
297 variance of the DV over the course of individual trials. In the case of an absorbing decision bound  
298 or attractor network, we would expect DV variability (measured as the DV time derivative) to  
299 decrease after reaching the bound. We indeed found that, on average, DV variability decreases  
300 over time within single trials (Fig. 5a, Extended Data Fig. 7a). This effect holds across all stimulus  
301 strengths, although variability peaks earlier and falls faster on the easiest trials (Fig. 5b, Extended  
302 Data Fig. 7b).

303

## 304 **Discussion**

305 While previous single-electrode recordings have strongly advanced our understanding of the  
306 neural correlates of perceptual decision-making, interesting dynamics in choice signals were lost  
307 to necessity of averaging data across trials. With a few notable exceptions<sup>3,24</sup>, deploying the  
308 statistical power of simultaneous multi-electrode recordings to track single-trial population  
309 dynamics during choice behavior is a recent advance<sup>1,2,6</sup>. Even more recent work has leveraged the  
310 power of brain-computer interfaces (BCIs) to study neural correlates of prediction, learning, and  
311 multisensory integration (as reviewed in Golub et al. 2016<sup>25</sup>). In this study, for the first time, we

312 probed moment-to-moment fluctuations in decision states using BCI-inspired closed loop  
313 experiments that enabled neurally contingent stimulus control and made behavioral validation of  
314 these fluctuations feasible (see Methods). We show that large fluctuations (up to several log units)  
315 in a decoded decision variable in premotor and primary motor cortices are nearly instantaneously  
316 (<100 ms) predictive of choice. We captured neural correlates of changes of mind in the form of  
317 robust changes in DV sign. The statistical regularities of these rare events match previous  
318 psychophysical CoM findings. Finally, we showed that larger DV values are resistant to additional  
319 pulses of sensory evidence, supporting the hypothesis that large DVs are associated with higher  
320 commitment to an upcoming choice.

321  
322 Importantly, the impressive choice prediction accuracy achieved in this study using a linear  
323 decoder does not imply that the brain's decision formation process is also linear. In principle, such  
324 a decoder could predict binary choices quite well even if the true neural process underlying  
325 decision formation were nonlinear, depending on the form of the nonlinearity (see, e.g., Sussillo  
326 et al. 2016<sup>26</sup> for an example of a linear neural to kinematic decoder which only slightly  
327 underperforms a more powerful nonlinear recurrent neural network). However, our linear DV is  
328 tightly linked to choice behavior (e.g. Fig. 2c), showing that variations in DV magnitude  
329 meaningfully track the ongoing process of decision formation despite the possible presence of  
330 nonlinearities in the underlying neural mechanism.

331  
332 Previous studies have described fluctuations in offline decoded decisions associated with changes  
333 of mind<sup>1-3,6</sup>. Here we confirm and extend those observations with neurally contingent interrogation  
334 of candidate CoM events, but we also find large, behaviorally relevant fluctuations even when the

335 DV remains on one side of the discriminant hyperplane in non-CoM trials (e.g. Figs. 1e and 2b).  
336 We wondered whether these DV fluctuations were related to stochastic variations in motion  
337 strength of the stimulus on single trials. While across coherence levels the average motion energy  
338 explains a large portion of DV variance (Extended Data Fig. 8a-b), our data shows that within  
339 coherence stochastic fluctuations in the stimulus are not the dominant cause of DV fluctuations  
340 (Extended Data Fig. 8c-d). Further experiments will be needed to address the source(s) of these  
341 fluctuations and their relationship with fluctuations in other brain areas<sup>27</sup> as well as other cognitive  
342 processes including motor preparation and execution<sup>28,29</sup>, attention, motivation, and confidence.  
343  
344 In addition to validating the behavioral relevance of neurally detected DV fluctuations, our ability  
345 to impose real-time task changes contingent upon them allowed us to show that neural and  
346 behavioral responses to pulses of additional sensory evidence diminish when pulses are presented  
347 at larger momentary DV values. These results, combined with the reduction in DV variability  
348 observed over the course of single trials, suggest the presence of an absorbing decision bound in  
349 these motor cortical neural populations, consistent with attractor dynamics in which the neural  
350 population converges on a stable state as a decision is formed<sup>22,23</sup>.  
351  
352 The conceptual and technical innovation that enabled these findings is our ability to accurately  
353 decode decision states in real time, which could bring the concept of cognitive prostheses<sup>30-33</sup> much  
354 closer to reality by providing another means of decoding subjects' goals for use as a flexible  
355 prosthetic control signal. More broadly, the real-time closed loop approach demonstrated here may  
356 be applicable not only to decision-making processes, but also to other cognitive phenomena such  
357 as working memory and attention.



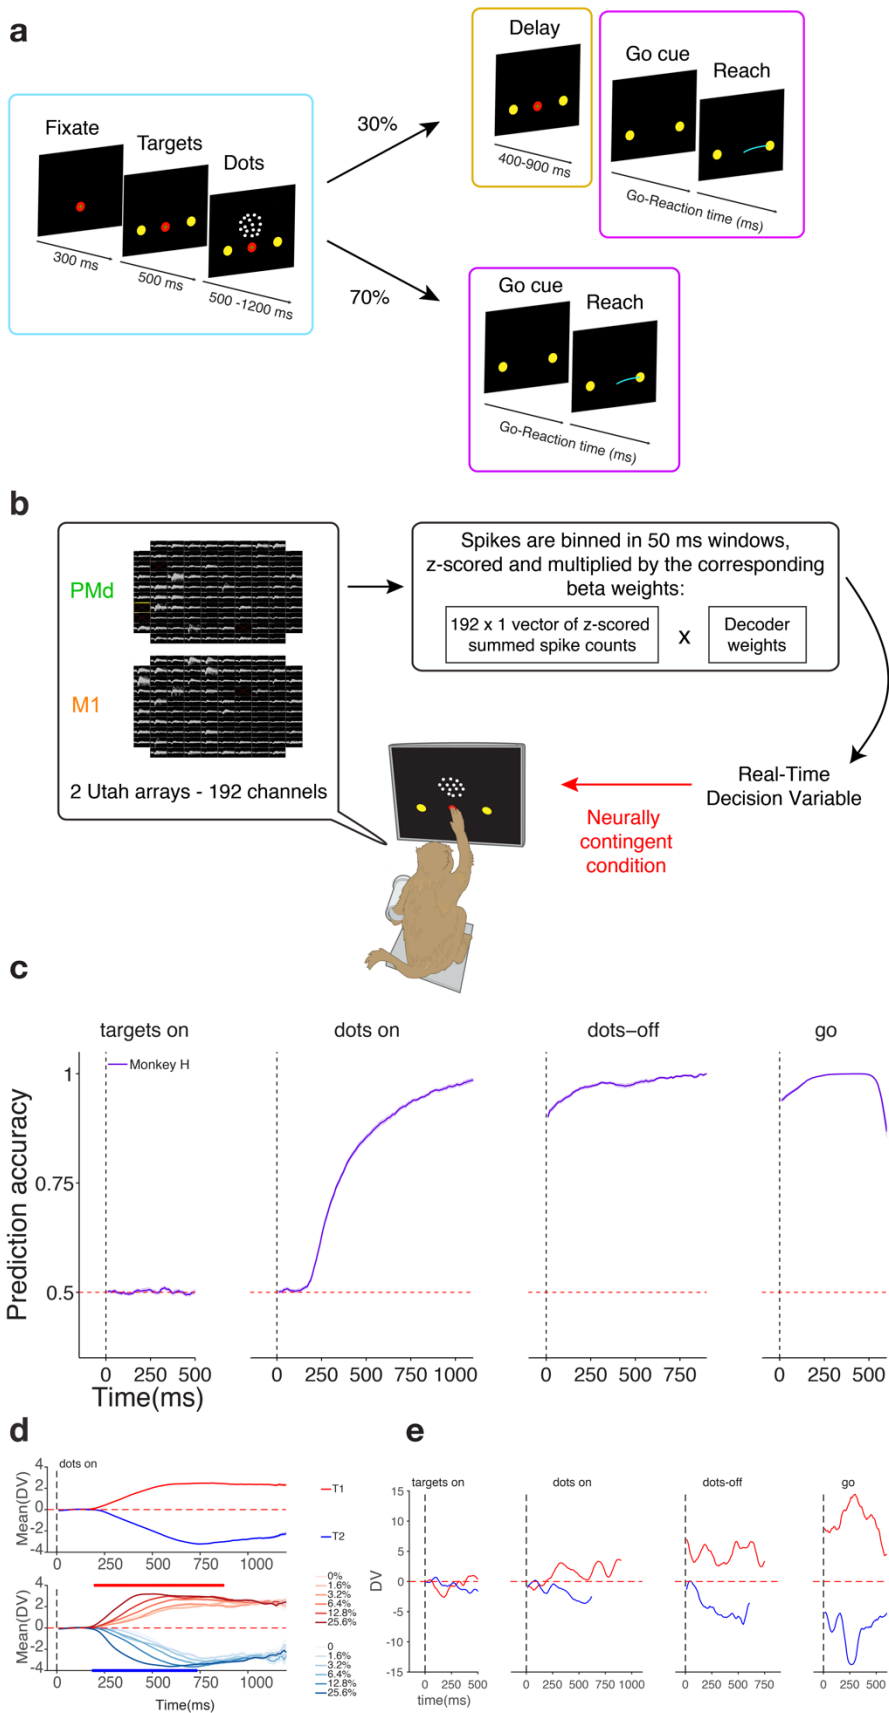

359 **Figure 1. Setup and performance of real-time readout of decision states during a motion**  
360 **discrimination task.**

361  
362 **a) Motion discrimination task.** Trials began with the onset of a fixation point (FP) on the  
363 touchscreen. Once both eye and hand fixation were acquired, two targets appeared on the screen.  
364 The motion stimulus was shown after a short delay (500 ms) and lasted 500-1200 ms for the open-  
365 loop trials. On 70% of the trials the dots offset was followed by the go cue (no delay period), while  
366 on the remaining 30% the subject was required to withhold a response for a random delay duration  
367 (400-900 ms). Decision states were continuously decoded during all epochs of the trial. Three  
368 different decoders were used during different trial epochs, shown by the different colored boxes  
369 (blue, yellow and purple; see Methods).

370 **b) Real-time, closed-loop setup.** Neural activity from 96-channel Utah Arrays was continuously  
371 recorded and processed while monkeys performed the motion discrimination task. For monkey H,  
372 two Utah arrays implanted in PMd and M1 were used. For monkey F only one Utah array  
373 implanted in PMd was utilized. During data collection, the recorded neural activity was binned,  
374 summed, z-scored and projected onto a single dimension: a linear choice decoder. The result of  
375 this operation was our real time read out of commitment, which could be used to stop the stimulus  
376 presentation in a neurally contingent manner (red arrow), thereby closing the loop in the  
377 experiment.

378 **c) Choice prediction accuracy obtained from real-time, open-loop readout.** Average  
379 prediction accuracy (see Methods) over time  $\pm$  SEM for monkey H is plotted in purple. Prediction  
380 accuracy is calculated for each time point aligned to four different events in the trial (targets onset,  
381 dots onset, dots offset and go cue) using the real-time DV and quantified as the fraction of trials in

382 which the classifier correctly predicted the monkey's upcoming choice. For logistic regression this  
383 operation is equivalent to comparing the DV sign to the choice sign. Accuracy was calculated for  
384 each session and averaged across sessions using a total of 16468 trials for monkey H.

385 **d) Average Decision Variable traces during dots period.** Top panel: Average DV during the  
386 dots epoch for right (red) and left (blue) choices for monkey H. Bottom panel: Average DV sorted  
387 by choice and stimulus coherence (correct trials only) for monkey H. Darker shades correspond to  
388 higher stimulus coherence. Red and blue dots indicate timepoints for which coherence was  
389 significant regressor of DV for T1 and T2 choices respectively (correct trials only,  $p < 10^{-5}$   
390 uncorrected). For monkey H coherence is a significant regressor of DV for at least one of the  
391 choices for the period between [190, 870] ms aligned to dots onset.

392 **e) Example DV traces captured during open loop trials.** DV traces for two trials are plotted as  
393 a function of time aligned to four different events: targets onset, dots onset, dots offset and go cue.  
394 The trial in red led to a right choice whereas the trial in blue led to a left choice. Despite the stability  
395 in DV sign for these two trials from ~250 ms after dots onset until the end of the trial, strong  
396 fluctuations in DV magnitude were observed in both cases, within and across epochs.

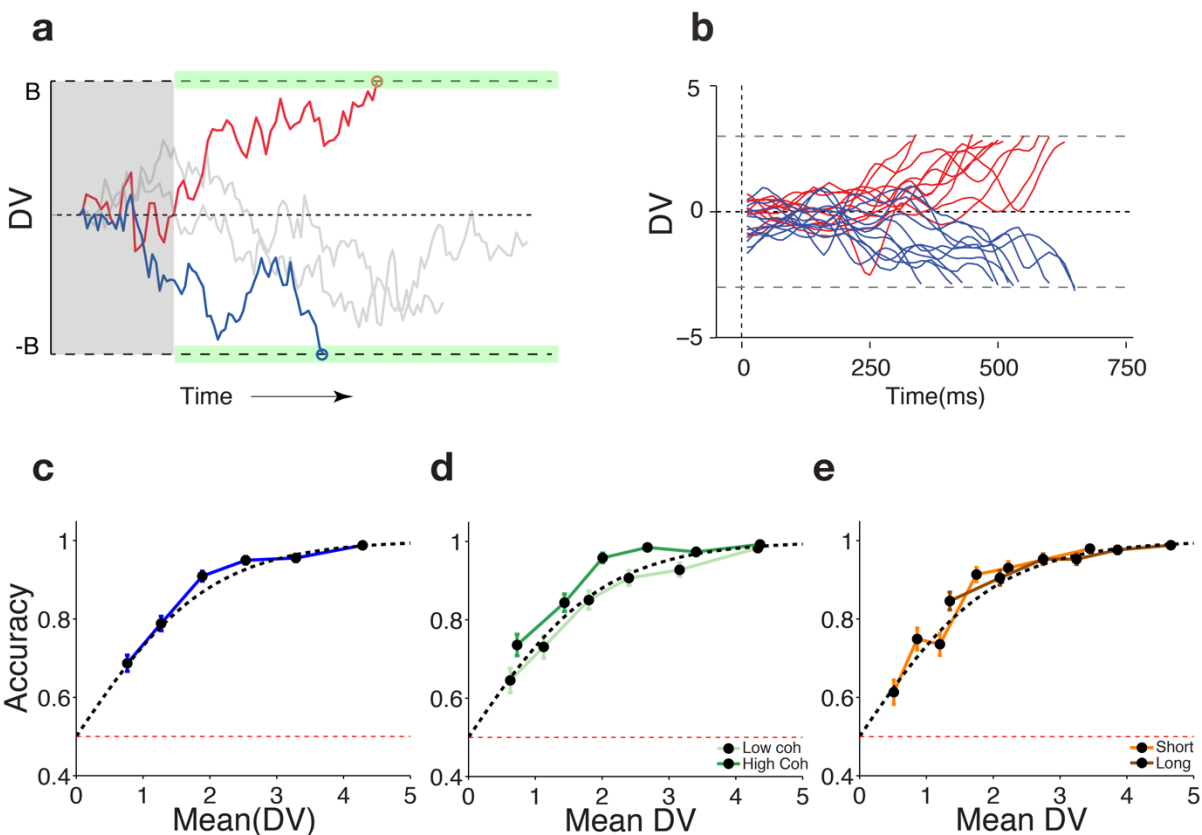

397

398

399 **Figure 2. Choice likelihood can be accurately decoded in real-time across experimental**  
400 **conditions using only 50 ms of neural data.**

401

402 **a) Schematic of the first closed loop experiment implemented in real time.** Virtual boundaries  
403 for DV magnitude (green shaded regions) were imposed and if reached, triggered the termination  
404 of the stimulus presentation. The subject was then immediately asked to report its decision. A 250  
405 ms minimum stimulus duration was imposed (grey shaded region) to prevent random fluctuations  
406 in the beginning of the trial from triggering stimulus termination. If the boundary wasn't reached,  
407 the stimulus was presented for a pre-selected random duration (500-1200 ms). Grey traces show  
408 cartoons of trials for which the boundary was not reached while red (blue) traces show terminated

409 trials that the decoder predicted would result in a right (left) choice. 5 different boundary values  
410 were used on each experiment.

411 **b) Example trials captured during the virtual boundary experiment.** Real-time DV time  
412 courses for example trials terminated using boundaries set at +3 and -3 DV units. Traces are  
413 colored according to behavioral choice at the end of the trial: right choices in red and left choices  
414 in blue. Data from one session from monkey H.

415 **c) Prediction accuracy as a function of DV magnitude.** Choice prediction accuracy for all trials  
416 collected during virtual boundary experiment as a function of DV magnitude for monkey H is  
417 shown in blue. Trials were split in 6 quantiles sorted by DV magnitude at termination. Prediction  
418 accuracy and median DV magnitude were calculated and plotted separately for each quantile (blue  
419 line with black symbols). Blue error bars show standard error of the mean for a binomial  
420 distribution. Dashed black line shows predicted accuracy from log-odds equation and red dashed  
421 line shows chance level. Data from 2973 trials from monkey H.

422 **d) Prediction accuracy as a function of DV and stimulus coherence.** Same data shown in **c)** but  
423 having pre-sorted the trials by coherence (see Methods). Dark green trace shows high coherence  
424 results and light green, low coherence results. Same conventions as in **c)**.

425 **e) Prediction accuracy as a function of DV and stimulus duration.** Same data shown in **c)** but  
426 having pre-sorted the trials by stimulus duration. Brown trace shows results for long trials and  
427 orange trace results for short trials (see Methods). Same conventions as in **c)**.

428

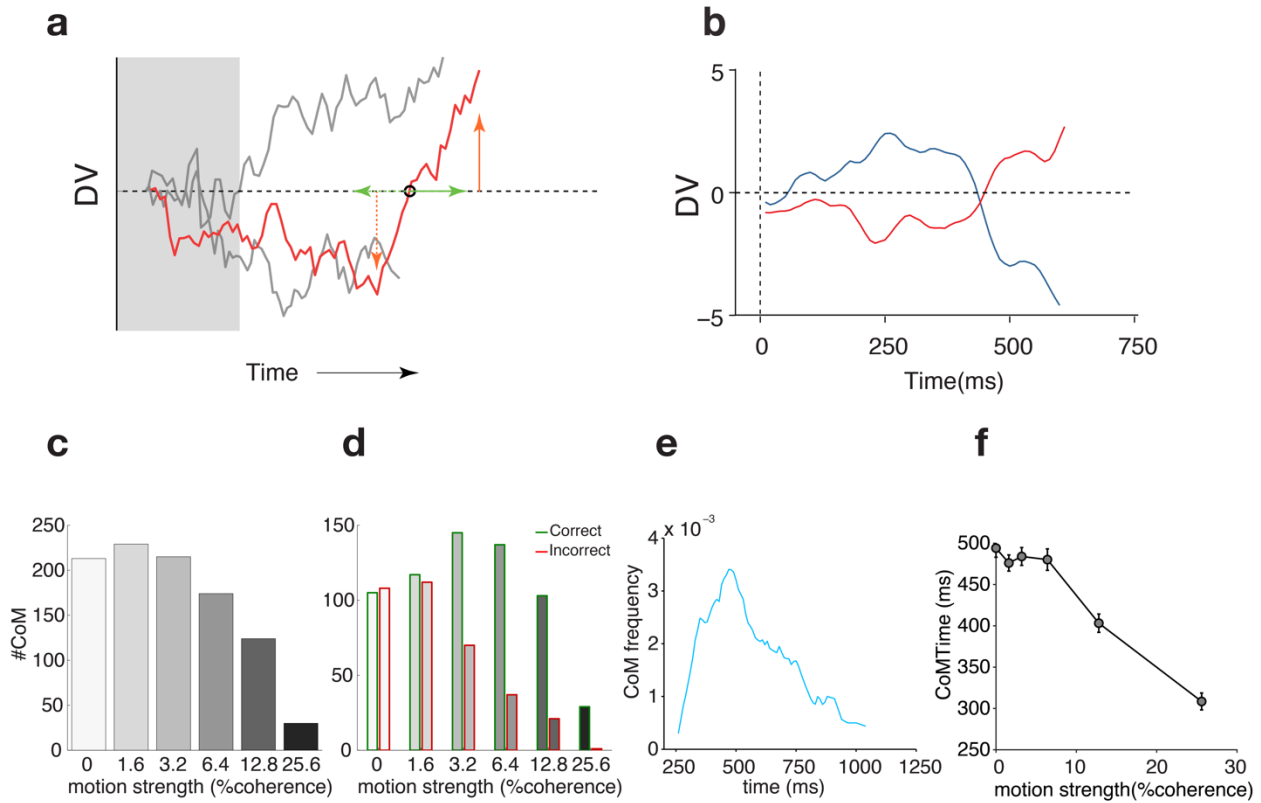

429

430

431 **Figure 3 Putative changes of mind can be detected and validated in real time.**

432

433 **a) Schematic of the second closed loop experiment implemented in real time.** The value and

434 history of the DV trace were tracked on each trial. If a 0 crossing (sign change in the DV) was

435 detected, the conditions required for termination were checked and termination was carried out if

436 the conditions were met (see Methods). In this example the conditions for temporal stability of DV

437 sign are depicted by the green horizontal arrows while the conditions for minimum DV deflection

438 before and after CoM are depicted by the orange arrows. Upon termination, the subject was

439 immediately asked to report its decision. A 250 ms minimum stimulus duration was imposed (grey

440 shaded region) such that random fluctuations in the beginning of the trial did not trigger stimulus

441 termination. If the conditions were not met or if a 0 crossing was never detected, the stimulus  
442 would be presented for a pre-selected random duration (500-1200 ms). Grey traces show cartoons  
443 of trials for which the 0 crossings would not meet the criteria while the red the trace shows a  
444 terminated trial that was predicted to lead to a rightward choice. One set of criteria for CoM validity  
445 was used in each session (Extended Data. Table 4).

446 **b) Example trials captured during the CoM experiment.** Real-time DV time courses for 2  
447 example trials with a putative CoM terminated after conditions were met (minimum DV pre and  
448 post CoM: 2 and minimum period of sign stability pre and post CoM: 150 ms). Traces are colored  
449 according to behavioral choice at the end of the trial: right choices in red and left choices in blue.  
450 Two trials from one session from monkey H.

451 **c) CoM frequency as a function of coherence.** Total number of CoMs detected for each  
452 coherence for monkey H.

453 **d) CoM frequency as a function of coherence and direction.** Total number of CoMs detected  
454 for each coherence and direction for monkey H. Red bars correspond to erroneous CoMs and green  
455 bars to corrective CoMs.

456 **e) CoM frequency as a function of time in the trial.** Frequency of CoMs detected as a function  
457 of time during stimulus presentation for monkey H. Because only CoMs that would have resolved  
458 by 250 msec after stimulus onset were considered, there is an edge effect with CoM frequency  
459 briefly increasing between ~250-450 msec after which it declines.

460 **f) CoM time as a function of coherence.** Average CoM time (defined as the zero crossing for  
461 each CoM trial) is plotted as a function of stimulus coherence. Error bars show s.e.m across trials  
462 for each condition. CoM time was negatively correlated with stimulus coherence ( $p=1.8 \times 10^{-17}$ )

463

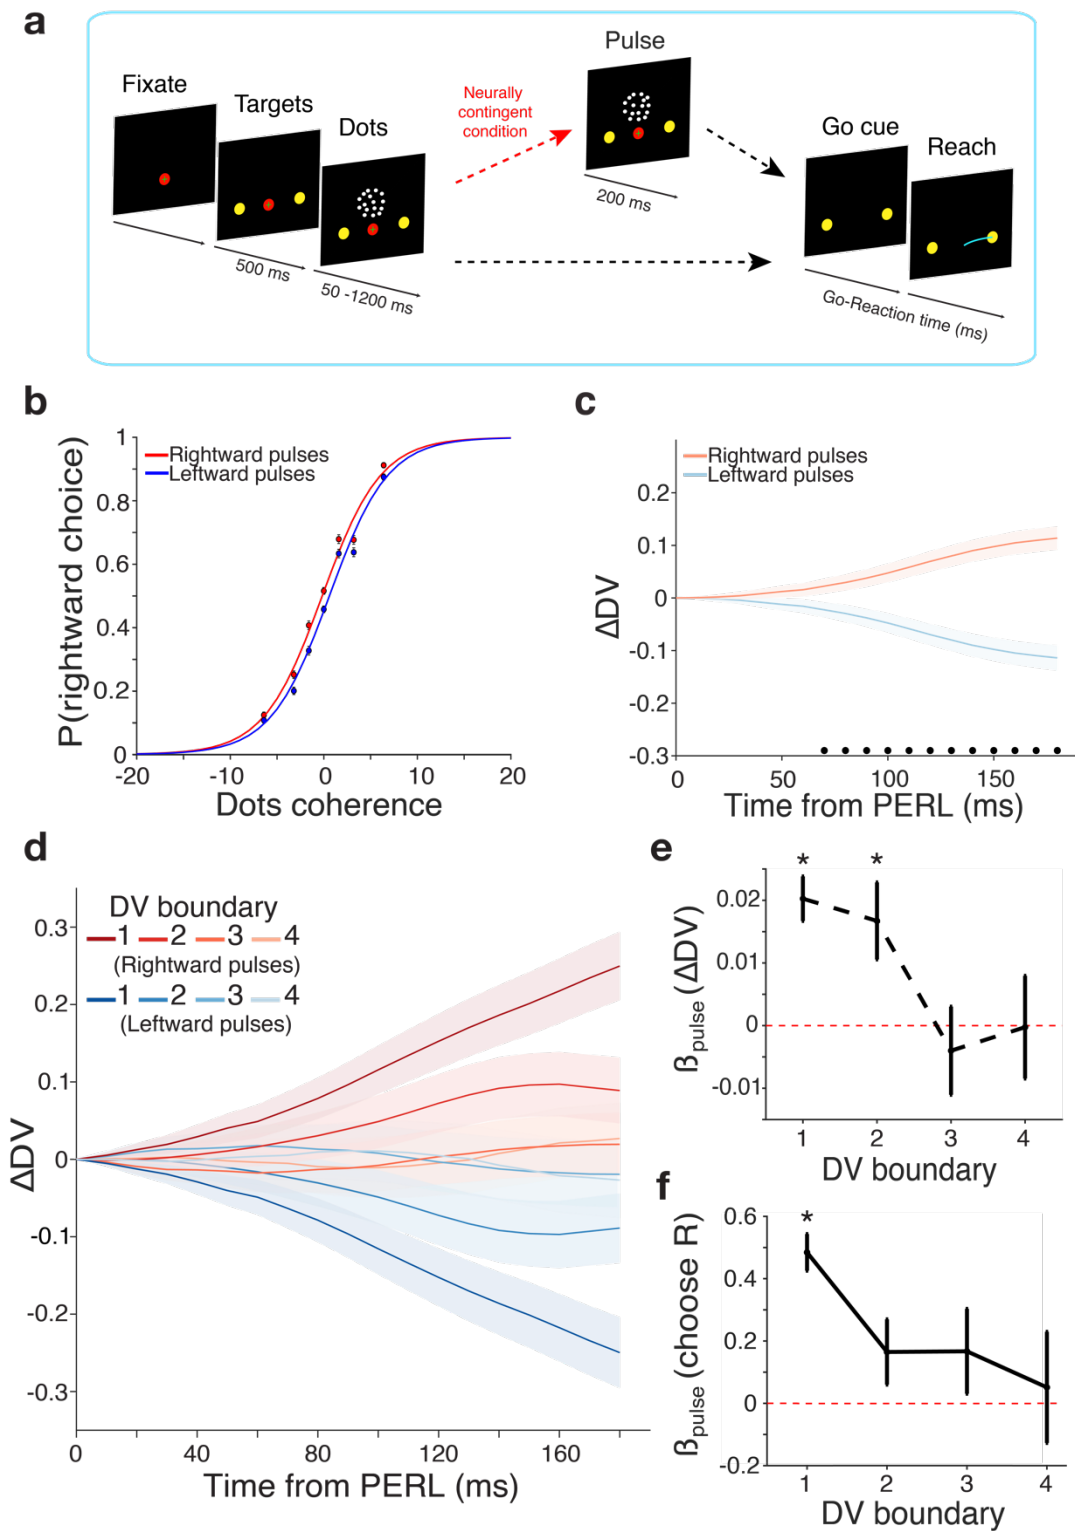



465

466 **Figure 4. Neurally triggered pulses of motion evidence nonlinearly bias both choice behavior**  
467 **and DV.**

468

469 **a) Motion pulse task.** As in the motion discrimination task, trials began with the onset of a fixation  
470 point (FP) on the touchscreen. Once both eye and hand fixation were acquired, two targets  
471 appeared. The motion stimulus was shown after a short delay (500 ms) and a maximum stimulus  
472 duration was randomly assigned from 500-1200 ms. Virtual boundaries for DV magnitude were  
473 imposed (randomly assigned to integer values from 1-4) and if reached, triggered a 200-ms pulse  
474 of additive dots coherence, randomly assigned to be rightward or leftward on each trial ( $\pm 2\%$   
475 coherence for monkey H), followed immediately by termination of the dots stimulus. A 50 ms  
476 minimum stimulus duration was imposed to ensure a minimum total stimulus duration of 250 ms.  
477 If the DV boundary wasn't reached, the dots stimulus was presented for a pre-selected random  
478 duration (500-1200 ms). Dots offset was followed by the go cue. Decision states were continuously  
479 decoded using the dots period decoder during all epochs of the trial (blue box, see Methods).

480 **b) Psychometric functions for pulse trials.** Curves were fit using logistic regression on choice  
481 with signed stimulus coherence and pulse direction as predictors, plus an intercept term. Data  
482 points show mean proportion of rightward choices for each stimulus coherence,  $\pm$  s.e.m. The pulse  
483 effect is equivalent to changing the overall stimulus coherence by 0.384% (standard error  
484 0.0514%,  $p = 8.38E-14$ ). Data from 9614 rightward and 9523 leftward pulse trials from monkey  
485 H.

486 **c) Average change in post-pulse DV from estimated Pulse Evidence Representation Latency**  
487 **(PERL), mean subtracted.**  $\Delta$ DV is the difference in the DV at each time point from the DV at

488 the PERL (170 ms for monkey H; see Methods). The mean  $\Delta DV$  across pulse directions in each  
489 time bin has been subtracted for visualization. Shaded error bars correspond to mean  $\pm$  s.e.m. Black  
490 dots indicate time bins in which  $\Delta DV$  is significantly different for trials with pulses in opposite  
491 directions (false discovery rate 0.05). Data from same trials as **b**).

492 **d) Average change in post-pulse DV for each DV boundary, mean subtracted.** Conventions  
493 as in **b**) but separated by the DV boundary triggering motion pulses in each direction. Darker colors  
494 correspond to smaller DV boundary magnitudes. Data from monkey H, minimum 1507 trials per  
495 condition shown.

496 **e) Pulse coefficients from linear regression on  $\Delta DV$  slope for each DV boundary.**  $\Delta DV$  slope  
497 is the single-trial slope of the  $\Delta DV$  from PERL to either the animal's median go-reaction time or  
498 150 ms prior to movement onset, whichever came first (as shown in **b**)). Multiple linear regression  
499 was performed separately on  $\Delta DV$  slope for trials at each DV boundary with the following  
500 predictors: signed dots coherence, pulse onset time, pulse direction, pulse onset time \* pulse  
501 direction, plus an intercept term. Data points and error bars represent the coefficient for pulse  
502 direction for trials at each DV boundary,  $\pm$  s.e.m.; asterisks denote significantly nonzero  
503 coefficients at 95% confidence. Data from same trials as **d**).

504 **f) Pulse coefficients from logistic regression on choice for each DV boundary.** Logistic  
505 regression was performed separately on the probability of a rightward choice for trials at each DV  
506 boundary with the following predictors: signed dots coherence, pulse onset time, pulse direction,  
507 pulse onset time \* pulse direction, plus an intercept term. Data points and error bars represent the  
508 coefficient for pulse direction for trials at each DV boundary,  $\pm$  s.e.m.; asterisks denote  
509 significantly nonzero coefficients at 95% confidence. Data from same trials as **d**).

510

$\Delta DV =$  Within trial variability

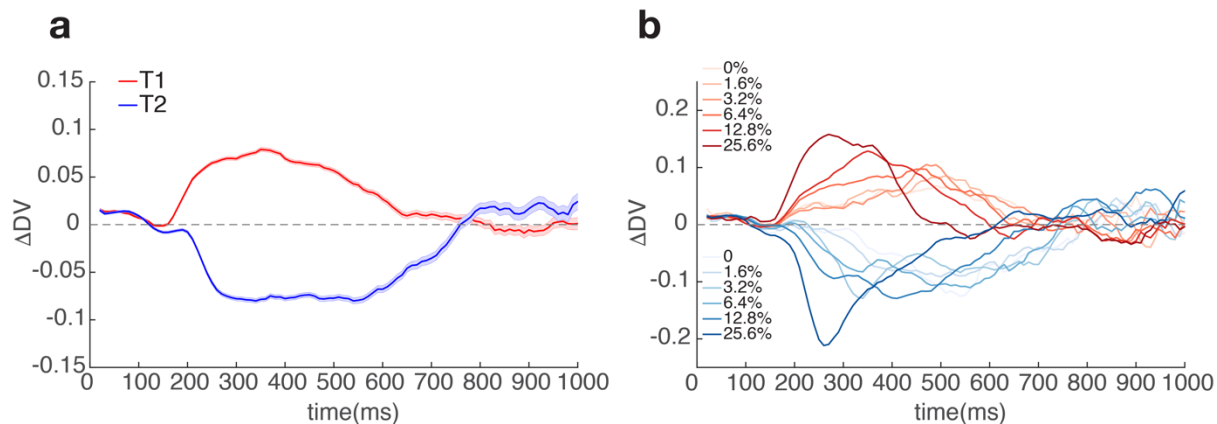

511

512

513 **Figure 5. Within trial DV variability decreases over time for long duration stimuli.**

514

515 **a) Average DV derivative as a function of time and choice - monkey H.**  $\Delta DV$  was calculated  
516 for each trial as the difference between consecutive DV estimates spaced out by 10 ms. Traces  
517 show average  $\Delta DV \pm$  s.e.m for right choices (red trace) and left choices (blue trace) during  
518 stimulus presentation.  $\Delta DV$  initially starts increasing around the expected stimulus latency (170  
519 ms) but progressively decreases for long (>600 ms) stimulus presentations.

520 **b) Average DV derivative as a function of time and signed coherence - monkey H.** Same data  
521 as in **a)** but with DV derivative averaged separately for each choice and motion coherence level  
522 (correct trials only). Right choices are plotted in red and left choices in blue as in **a)**. Darker traces  
523 correspond to stronger coherences.

524

525

526

527 **Extended Data**

528

| <b>Logistic Regression on Choice</b>     |                   |                      |                |                   |                      |                |
|------------------------------------------|-------------------|----------------------|----------------|-------------------|----------------------|----------------|
| <b>Predictor</b>                         | <b>Monkey H</b>   |                      |                | <b>Monkey F</b>   |                      |                |
|                                          | <b>Beta Value</b> | <b>95% CI</b>        | <b>p-value</b> | <b>Beta Value</b> | <b>95% CI</b>        | <b>p-value</b> |
| Bias                                     | -0.1613           | [-0.2987 , -0.02381] | 0.02147        | -0.1197           | [-0.2413 , 0.001806] | 0.0535         |
| Coherence                                | 2.747             | [ 2.268 , 3.227]     | 2.757e-29      | 1.885             | [ 1.55 , 2.22]       | 2.912e-28      |
| DV Termination                           | 2.073             | [ 1.779 , 2.367]     | 1.887e-43      | 1.708             | [ 1.52 , 1.895]      | 1.626e-71      |
| DV Diff                                  | 0.2989            | [0.0488 , 0.5491]    | 0.01916        | 0.577             | [0.4062 , 0.7478]    | 3.586e-11      |
| Stimulus duration                        | 0.1199            | [-0.01489 , 0.2548]  | 0.08125        | 0.07474           | [-0.04713 , 0.1966]  | 0.2293         |
| Stimulus duration*<br>Stimulus direction | -0.02803          | [-0.2053 , 0.1492]   | 0.7566         | 0.0466            | [-0.1132 , 0.2064]   | 0.5677         |

529

530 **Extended Data Table 1 – Coefficients obtained from logistic regression on choice – virtual**

531 **boundary experiment (monkeys H and F)**

532

| <b>Logistic Regression on Choice after CoM</b> |                   |                     |                |                   |                      |                |
|------------------------------------------------|-------------------|---------------------|----------------|-------------------|----------------------|----------------|
| <b>Predictor</b>                               | <b>Monkey H</b>   |                     |                | <b>Monkey F</b>   |                      |                |
|                                                | <b>Beta Value</b> | <b>95% CI</b>       | <b>p-value</b> | <b>Beta Value</b> | <b>95% CI</b>        | <b>p-value</b> |
| Bias                                           | -0.2876           | [-0.4658 , -0.1093] | 0.001568       | -0.192            | [-0.3773 , -0.00662] | 0.04235        |
| Coherence                                      | 1.304             | [ 1.005 , 1.602]    | 1.189e-17      | 1.284             | [ 0.96 , 1.608]      | 8.028e-15      |
| DV Termination                                 | 1.67              | [ 1.158 , 2.182]    | 1.623e-10      | 2.46              | [ 1.872 , 3.049]     | 2.51e-16       |
| DV max opposite                                | 0.06967           | [-0.4461 , 0.5854]  | 0.7912         | -0.2387           | [-0.8959 , 0.4185]   | 0.4766         |
| Time after CoM *<br>sign(DV Termination)       | 0.7065            | [0.2317 , 1.181]    | 0.003544       | 0.02265           | [-0.3835 , 0.4288]   | 0.913          |
| Time before CoM *<br>sign(DV max opposite)     | 0.7471            | [0.3083 , 1.186]    | 0.0008467      | -0.1427           | [-0.6394 , 0.3539]   | 0.5732         |

533

534 **Extended Data Table 2– Coefficients obtained from logistic regression on choice - change of**  
 535 **mind experiment (monkeys H and F)**

536  
 537  
 538  
 539

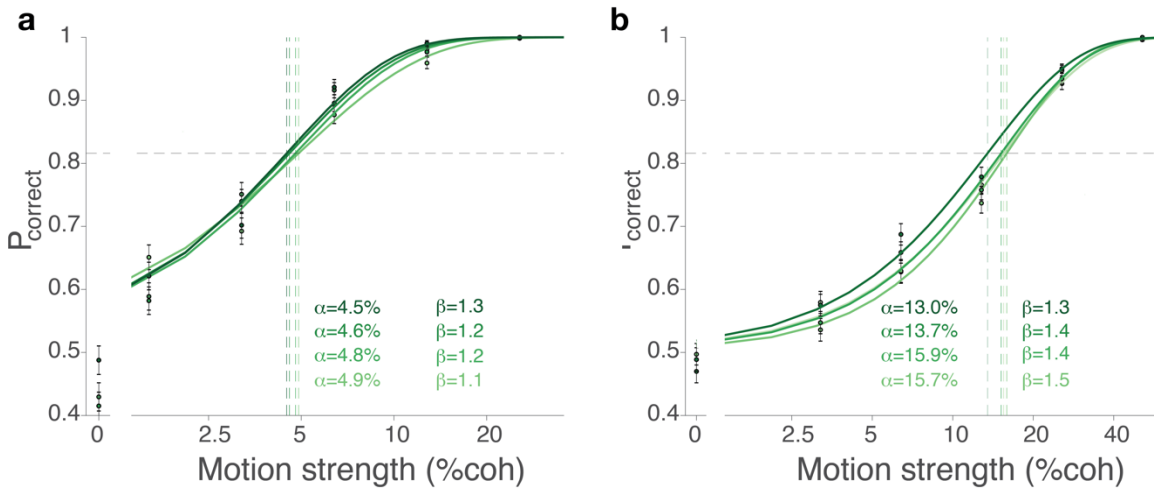

540  
 541  
 542

**Extended Data Figure 1 - Behavioral performance - Variable duration task.**

543

544 **a) Psychophysical performance for monkey H in the variable duration task.** Percentage  
 545 correct is plotted as a function of net motion coherence (calculated for both directions). Trials were  
 546 sorted for stimulus duration in 4 quartiles from long (dark green curve) to short (light green curve).  
 547 Data from each quartile were fit separately by a Weibull curve. Inset shows fit parameters for each  
 548 quartile. Data from 12516 open loop trials. Stimulus duration quartiles: Q1: [0.500 , 0.574] s Q2:  
 549 [0.574 , 0.680] s Q3[0.680 , 0.827] s Q4: [0.827, 1.200] s.

550 **b) Psychophysical performance for monkey F in the variable duration task.** Same as a) for  
 551 monkey F. Data from 12365 open loop trials. Stimulus duration quartiles: Q1: [0.500 , 0.574] s  
 552 Q2: [0.574 , 0.667] s Q3[0.667 , 0.813] s Q4: [0. 813, 1.200] s.

553

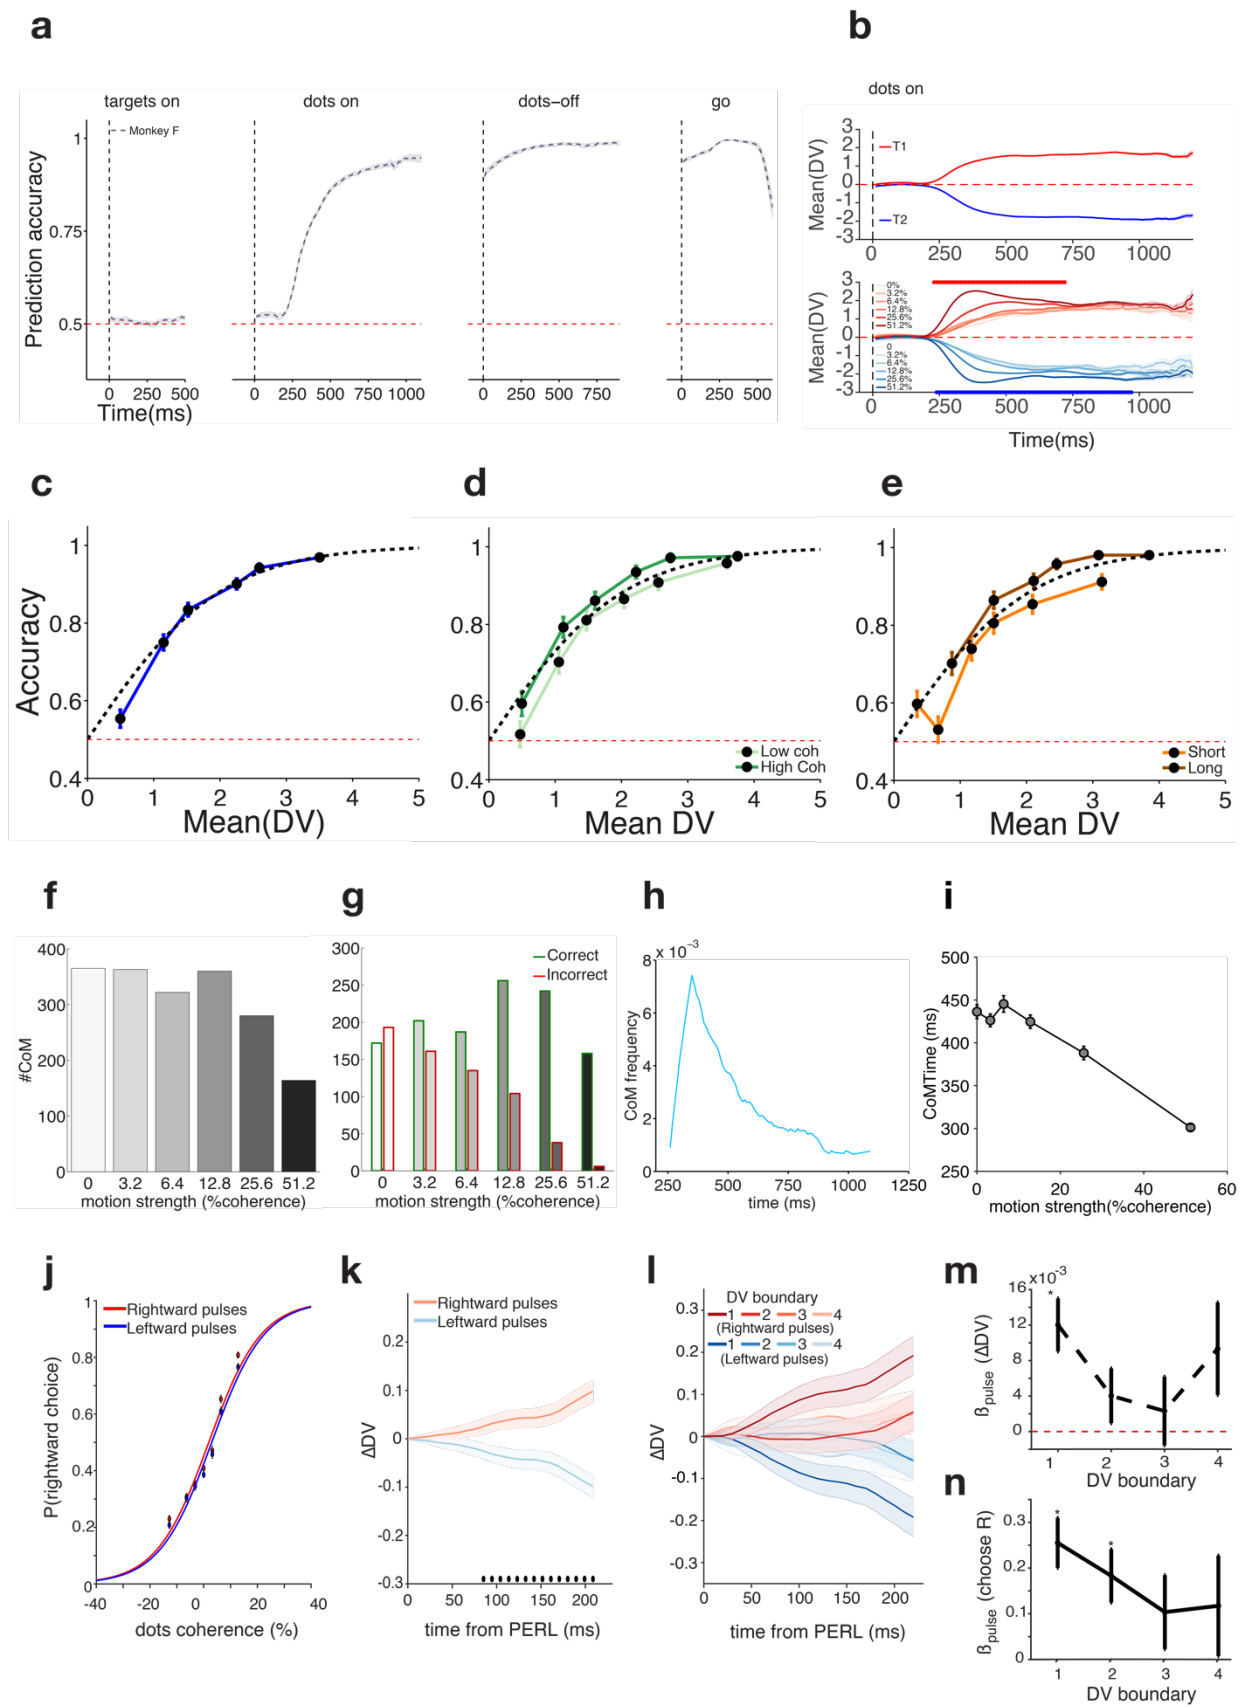

555

556 **Extended Data Figure 2 - Results for decoding and perturbation of DV in real time - monkey**

557 **F**

558

559 **a) Choice prediction accuracy obtained from real-time readout.** Same as **Figure 1c** for monkey

560 F. Accuracy was calculated for each session and averaged across sessions using a total of 15826

561 trials.

562 **b) Average Decision Variable traces during dots period.** Same as **Figure 1d** for monkey F. For

563 monkey F coherence is a significant regressor of DV for at least one of the choices for the period

564 between [230, 970] ms aligned to dots onset.

565 **c) Prediction accuracy as a function of DV magnitude.** Same as **Figure 2c** for monkey F. Data

566 from 2518 trials from monkey F.

567 **d) Prediction accuracy as a function of DV and stimulus coherence.** Same data shown in **c** but

568 having pre-sorted the trials by coherence (see Methods). Dark green trace shows high coherence

569 results and light green, low coherence results. Same conventions as in **c**.

570 **e) Prediction accuracy as a function of DV and stimulus duration.** Same data shown in **c**) but

571 having pre-sorted the trials by stimulus duration. Brown trace shows results for long trials and

572 orange trace results for short trials (see Methods). Same conventions as in **c**).

573 **f) CoM frequency as a function of coherence.** Same as **Figure 3c** for monkey F.

574 **g) CoM frequency as a function of coherence and direction.** Same as **Figure 3d** for monkey F.

575 **h) CoM frequency as a function of time in the trial.** Same as **Figure 3e** for monkey F.

576 **i) CoM time as a function of coherence.** Same as **Figure 3f** for monkey F. CoM time was

577 negatively correlated with stimulus coherence ( $p = 3.0 \times 10^{-30}$ )

578 **j) Psychometric functions for pulse trials.** Same as **Figure 4b** for monkey F. The pulse effect is  
579 equivalent to changing the overall stimulus coherence by 0.545% (standard error 0.146%,  $p =$   
580  $1.95E-4$ ). Data from 10370 rightward and 9967 leftward pulse trials.

581 **k) Average change in post-pulse DV from estimated Pulse Evidence Representation Latency**  
582 **(PERL), mean subtracted.** Same as **Figure 4c** for monkey F. PERL = 180 ms. Data from same  
583 trials as **j**).

584 **l) Average change in post-pulse DV for each DV boundary, mean subtracted.** Same as **Figure**  
585 **4d** for monkey F. Minimum 1731 trials per condition shown.

586 **m) Pulse coefficients from linear regression on  $\Delta$ DV slope for each DV boundary.** Same as  
587 **Figure 4e** for monkey F.

588 **n) Pulse coefficients from logistic regression on choice for each DV boundary.** Same as **Figure**  
589 **4f** for monkey F.

590



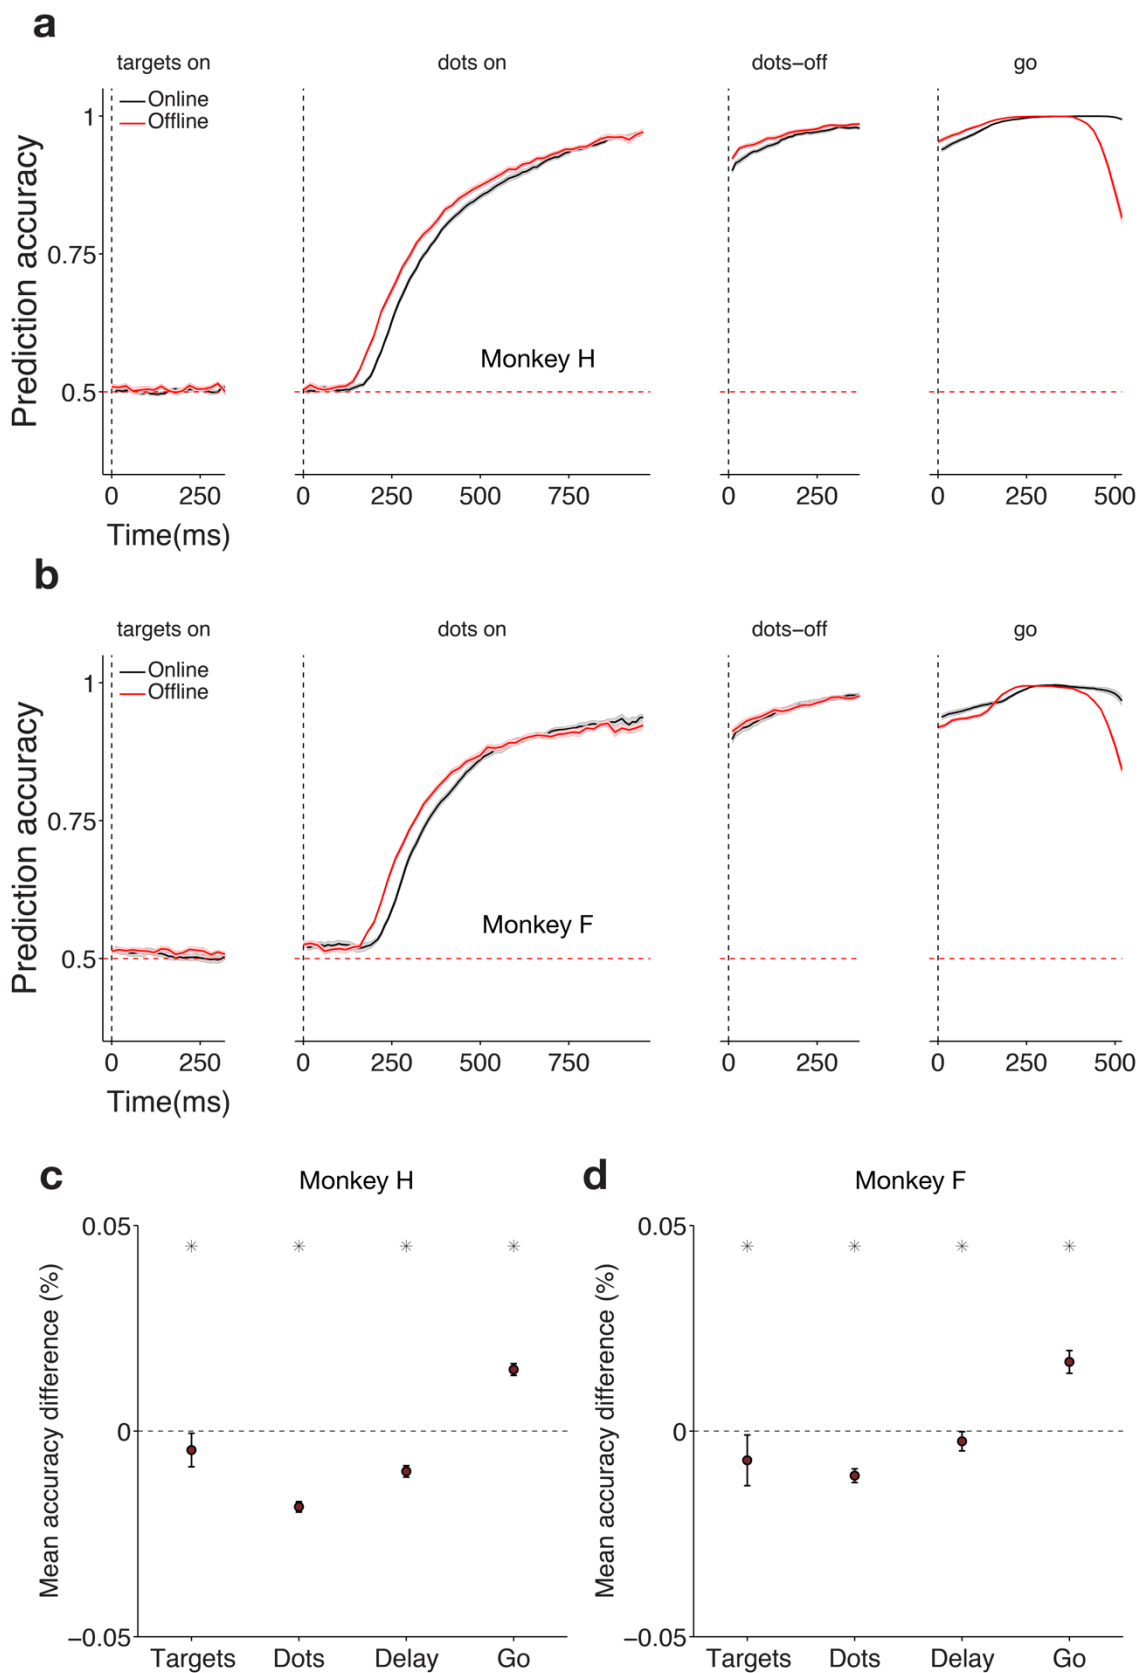

592 **Extended Data Figure 3 - Prediction accuracy online, offline and as a function of stimulus**  
593 **coherence.**

594

595 **a) Online and Offline classifiers result in similar performance for targets, dots delay and**  
596 **post-go epochs for monkey H.** Average prediction accuracy (see Methods) over time  $\pm$  SEM  
597 (across sessions) for monkey H. Online / offline classifier results are plotted in black / red. Data  
598 in black is re-plotted from Figure 2a. Prediction accuracy is very similar online and offline across  
599 the trial (see c)).

600 **b) Online and Offline classifiers result in similar performance for targets, dots delay and**  
601 **post-go epochs for monkey F.** Same as a but for monkey F. Same conventions apply.

602 **c) Summary of performance difference between online and offline classifiers within each**  
603 **epoch for monkey H.** Average performance difference between online and offline classifiers  
604 (accuracy difference in percentage correct) for each of the epochs plotted in a). Positive number  
605 numbers correspond to better online classifier performance and negative numbers to better offline  
606 classifier performance. Black asterisks correspond to windows for which the differences were  
607 significantly larger than zero (Wilcoxon signed-rank test,  $P < 0.001$ ).

608 **d) Summary of performance difference between online and offline classifiers within each**  
609 **epoch for monkey F.** Same as c) for monkey F. For both monkeys c) and d) the difference of  
610 choice prediction accuracies between the online and the offline classifiers was small and negative  
611 for the target, dots and delay epochs (between -0.2% and -1.9%). In contrast, for the post-go  
612 period, the difference in prediction accuracies was slightly positive (1.5% and 1.7% for monkey  
613 H and F respectively).

614

### Monkey H

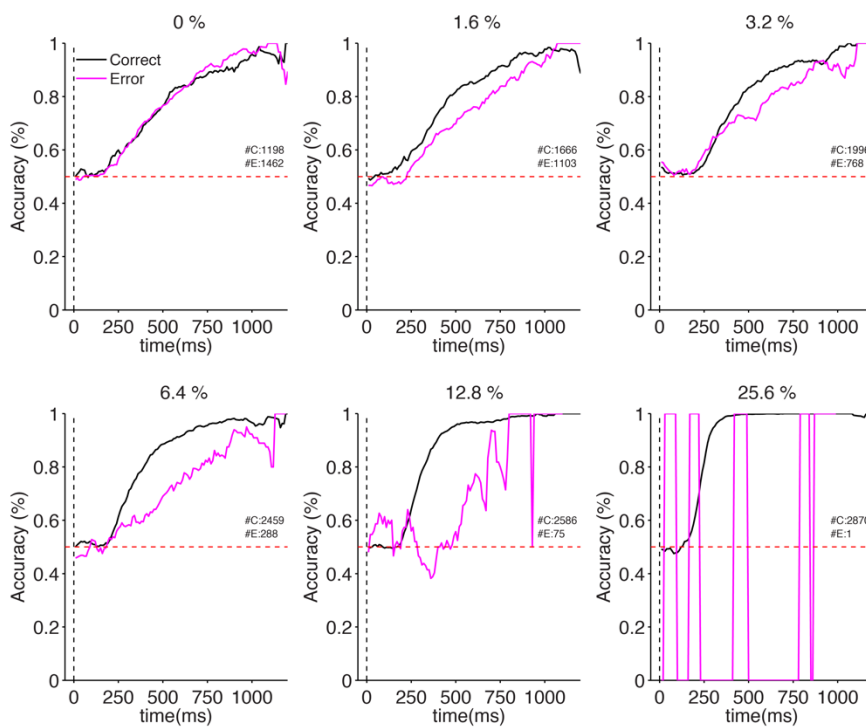

### Monkey F

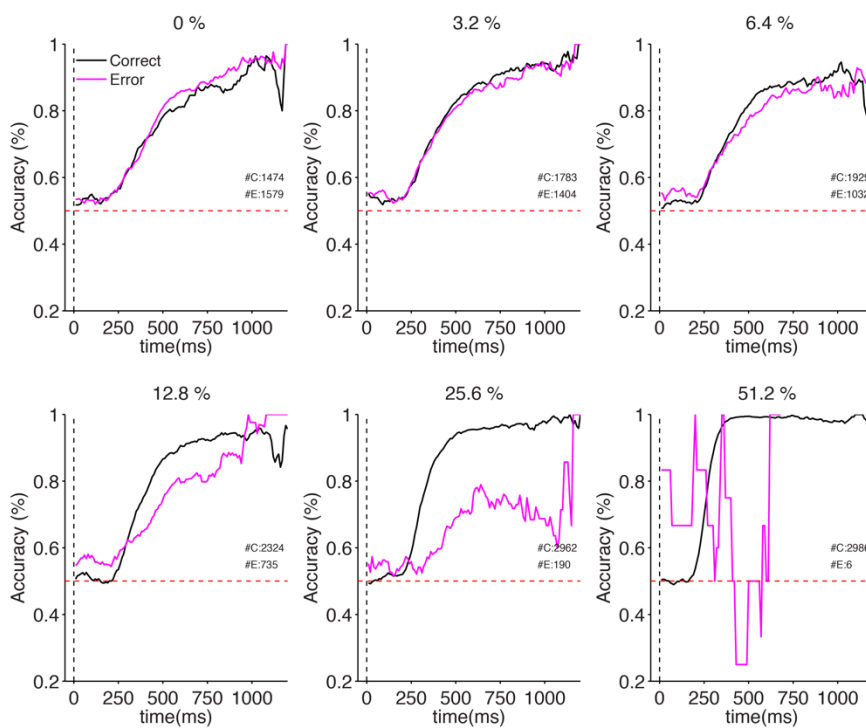

616 **Extended Data Figure 4 – Choice prediction accuracy for correct and incorrect trials as a**  
617 **function of coherence.**

618

619 Choice prediction accuracy obtained from real-time readout for correct and incorrect trials for each  
620 level of coherence. Prediction accuracy during dots epoch for each coherence level is plotted for  
621 correct (black) and error (magenta) trials. Red dashed line corresponds to chance level. Insets show  
622 total number of Correct (C) and Error (E) trials used in the analysis. Data for monkey H and F are  
623 shown in top and bottom panels, respectively. Mean prediction accuracy for error trials after neural  
624 latency (180 ms after stimulus presentation) is outside (and lower than) the 95% CI for correct  
625 trials for 1.6%, 3.2%, 6.4%, 12.8% and 25.6% coherences for monkey H and for 12.8%, 25.6%  
626 and 51.2% coherences for monkey F - 1000 bootstrap iterations. Results for the highest coherence  
627 for each monkey should be interpreted carefully due to the extremely low number of error trials  
628 for these conditions resulting from excellent behavioral performance.

629

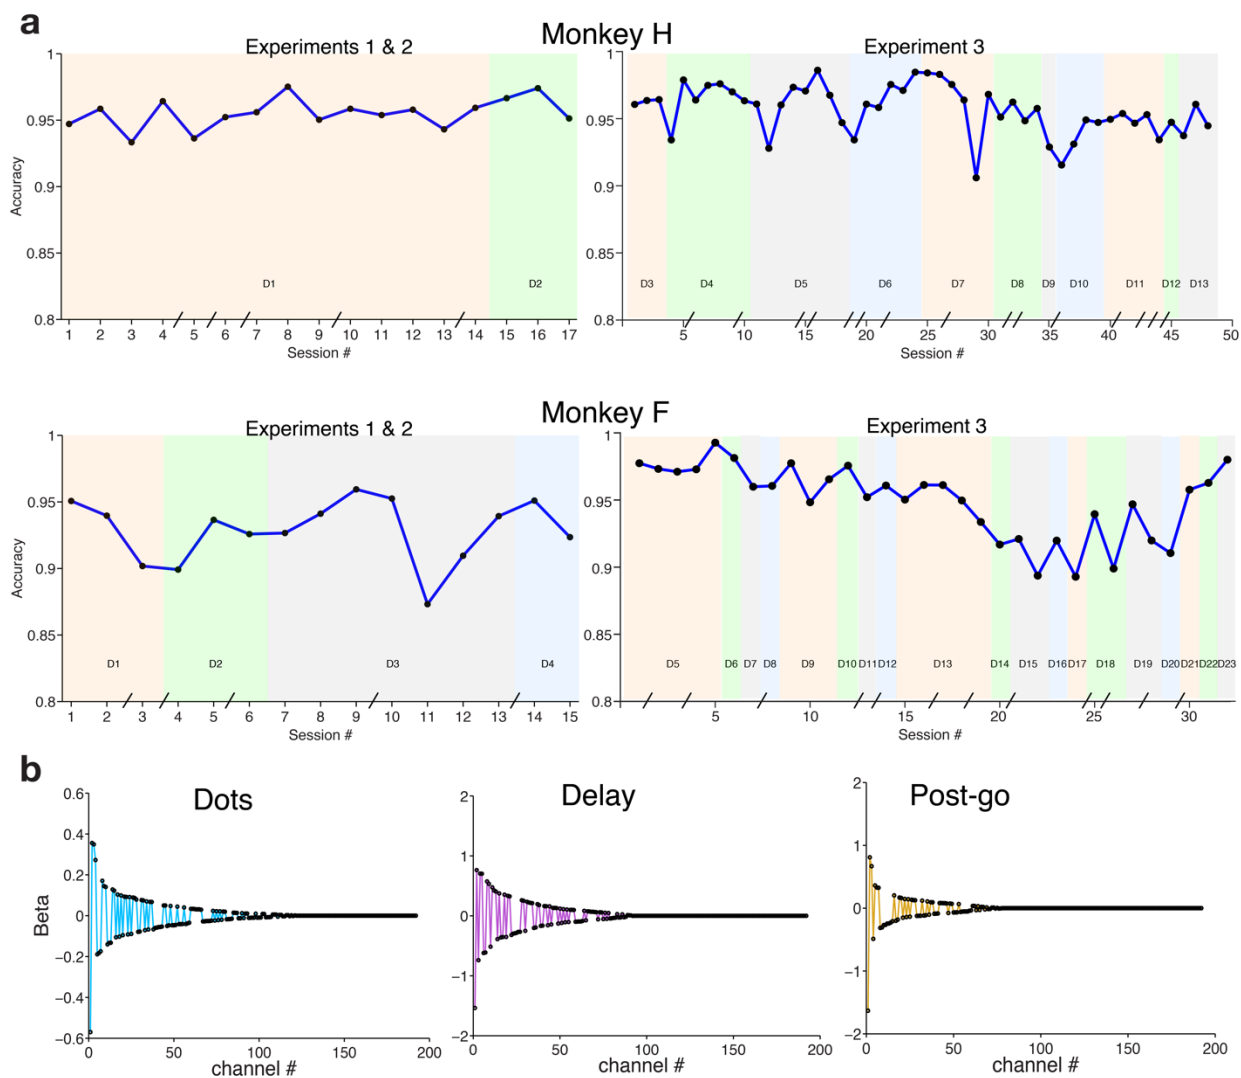

630

631 **Extended Data Figure 5 – Real time decoding: performance reliability and decoder weights.**

632

633 **a) Decoding performance is stable across sessions.** Average prediction accuracy during the

634 second half of the stimulus presentation (600-1200 ms) across all sessions for monkey H (top

635 panels) and monkey F (bottom panels). D1-D23 denote different decoders (sets of beta weights)

636 used for the recorded sessions. For monkey H the same decoder (D1) was used for the first 14

637 sessions. The breaks on the x-axis correspond to sessions that occurred on non-consecutive days.

638 **b) Real time decoder beta weights.** Beta weights during the dots period (left panel) ranked by  
639 absolute magnitude for an example decoder used in real time experiments. Channels with no or  
640 little choice predictive activity during this period had their weights set to zero by using LASSO  
641 regularization to prevent over fitting. Delay period and Post go cue Beta weights are shown in the  
642 middle and right panels respectively.  
643

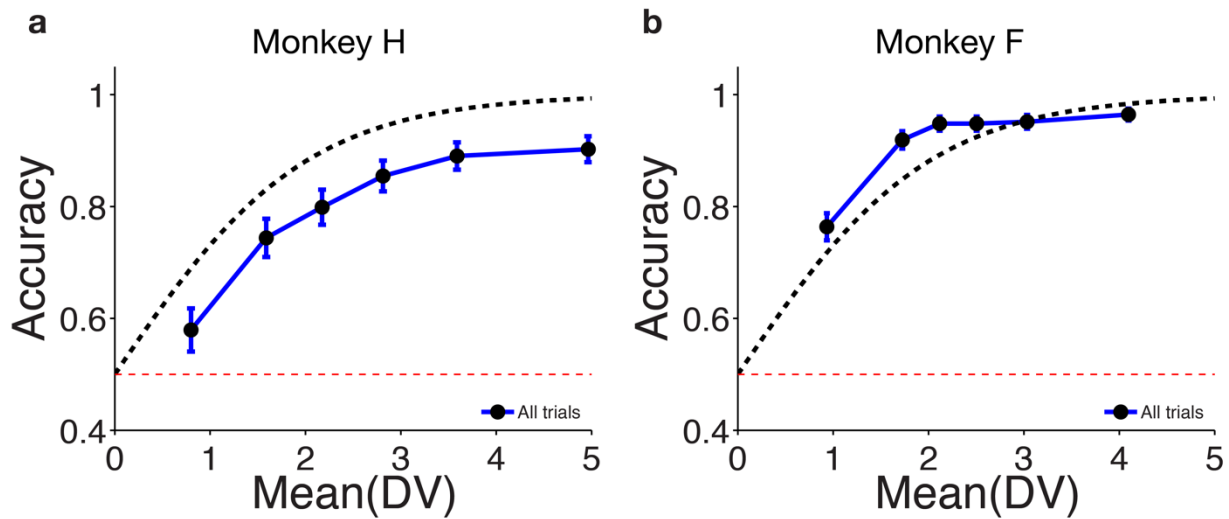

644

645

646 **Extended Data Figure 6 – Prediction accuracy as a function of DV for CoM trials.**

647

648 **a) Choice prediction accuracy for all trials collected during the CoM detection experiment -**  
649 **monkey H.** Trials were split in 6 quantiles sorted by DV magnitude at termination. Prediction  
650 accuracy and median DV magnitude was calculated and plotted separately for each quantile (blue  
651 line with black markers). Blue error bars show standard error of the mean for a binomial  
652 distribution. Dashed black line shows predicted accuracy from log-odds equation and red dashed  
653 line shows chance level. Data from 985 CoM trials from monkey H.

654 **b) Choice prediction accuracy for all trials collected during the CoM detection experiment -**  
655 **monkey F. Same as a) for monkey F using 1727 CoM trials.**

656

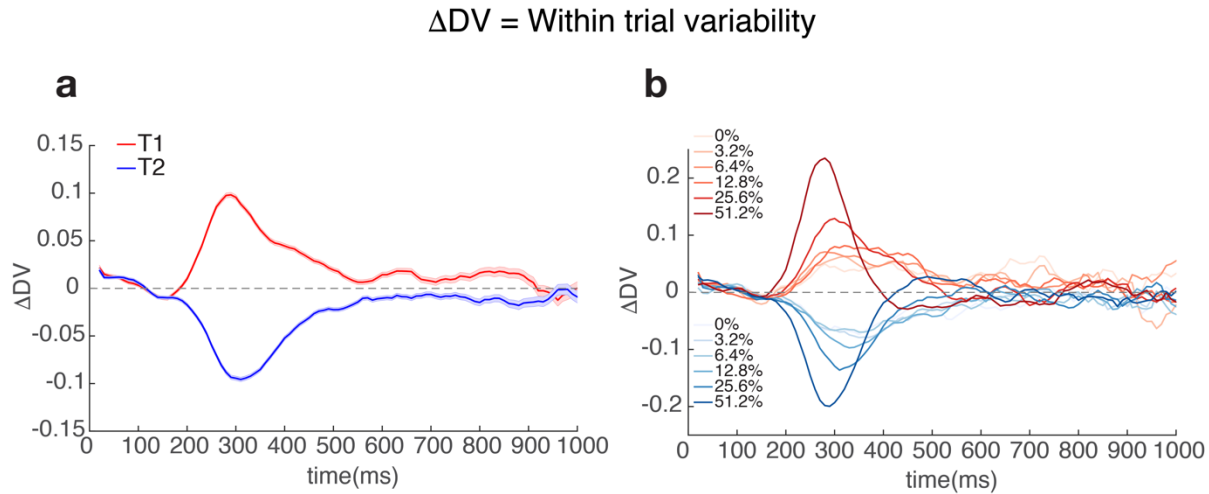

657

658 **Extended Data Figure 7 – Within trial variability as a function of time, choice and stimulus**  
659 **coherence.**

660

661 **a) Average DV derivative as a function of time and choice - monkey F.** DV derivative was  
662 calculated for each trial as the difference between consecutive DV estimates spaced out by 10 ms.  
663 Traces show average DV derivative +/- s.e.m for right choices (red trace) and left choices (blue  
664 trace).

665 **b) Average DV derivative as a function of time and signed coherence - monkey F.** Same data  
666 as in **a)** but with DV derivative averaged separately for each choice and motion coherence level  
667 (correct trials only). Right choices are plotted in red and left choices in blue as in **a)**. Darker traces  
668 correspond to stronger coherences.

669

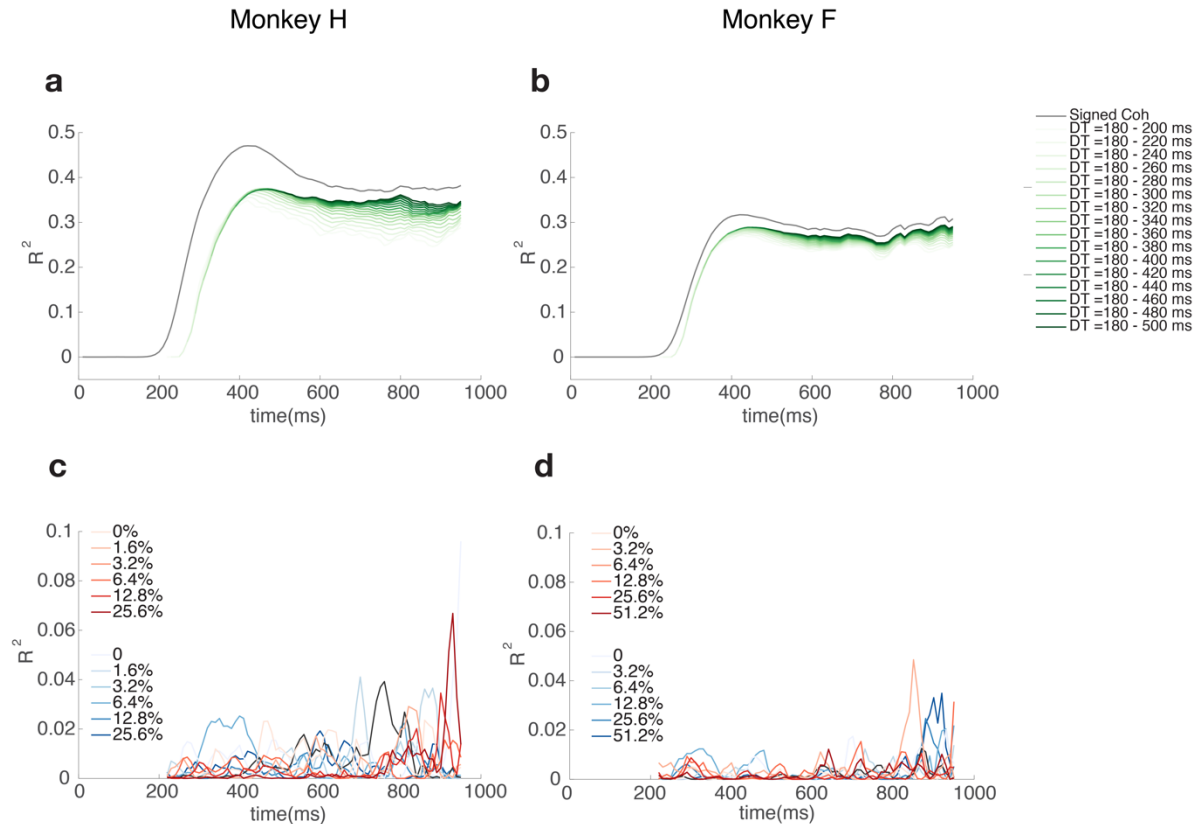



682 **c) Correlation between stimulus motion energy and decision variable within each level of**  
683 **signed coherence level - monkey H.** Proportion of variance explained when regressing DV for  
684 each time point and within each level of signed coherence as a function of the motion energy  
685 preceding it by 180 ms (the estimated neural response delay). Within each level of signed  
686 coherence, the DV fluctuations are not predicted by the motion energy traces

687 **d) Correlation between stimulus motion energy and decision variable within each level of**  
688 **signed coherence level - monkey F.** Same as **c)** for monkey F.

689

## 690 **Methods**

691

### 692 **Subjects**

693

694 Our experiments were performed on two adult male macaque monkeys (*Macaca mulatta*) trained  
695 to perform a direction discrimination task with reaching movements of the arm as operant  
696 responses. These were the same subjects used in our previous study<sup>10</sup>, but with new experiments.  
697 All training, surgery, and recording procedures conformed to the National Institutes of Health  
698 Guide for the Care and Use of Laboratory Animals and were approved by Stanford University  
699 Animal Care and Use Committee.

700

### 701 **Apparatus**

702

703 Monkeys sat in a custom-made primate chair (Stanford Machine Shop) in front of a video  
704 touchscreen, with their heads restrained using a surgical implant. The front plate of the chair could

705 be opened, allowing the subjects to reach the touchscreen with the arm contralateral to the  
706 implanted hemisphere. The ipsilateral arm was gently restrained using a delrin tube and a cloth  
707 sling. Stimuli were shown on the video touchscreen (ELO Touchsystems 1939L), which was  
708 positioned approximately 35.5 cm away from the monkeys' heads and allowed hand position to be  
709 tracked at 75Hz. Eye position was continuously tracked with an infrared eye tracker at 1kHz  
710 (EyeLink 1000, SR Research, Canada).

711

### 712 **Motion Discrimination Task**

713

714 The task employed is a variation of the classical random dots motion discrimination task, in which  
715 the subject uses an arm movement as the operant response<sup>10</sup> (Fig. 1a). We used a variable duration  
716 version of this task in which the duration of the stimulus presentation varied from trial to trial.  
717 There were two types of trials in our experiments: *open loop*, in which the stimulus duration was  
718 determined by the experimenter at the beginning of the trial and *closed loop*, in which the duration  
719 was contingent on a specific pattern of neural activity detected in real time (see Experiments 1-3).  
720 The subject was never cued on what type of trial it was on. For open-loop trials stimulus duration  
721 ranged from 500-1200 ms (median 670 ms) and was randomly chosen on each trial by sampling  
722 an exponential distribution. For closed-loop trials the possible values for duration ranged between  
723 250-1200 ms and were determined on each trial either by the timepoint at which the termination  
724 conditions were met or a predetermined random duration sampled from the open loop distribution,  
725 whichever came first. All trials started with the onset of a fixation point (FP; 1.5 degree diameter)  
726 on the video touchscreen (Fig. 1a). To initiate the task, the monkey was required to maintain both  
727 eye and hand fixation within +/- 3 degrees of the FP as long as it remained on the screen.

728 Importantly, throughout the entire trial, the monkey was required to always maintain direct hand  
729 contact with the screen, otherwise the trial would be aborted.

730

731 After 300 ms of fixation, two targets (1.5 degree diameter) appeared on opposite sides of the FP  
732 (eccentricities between 10 and 17 degrees). After a 500 ms delay the random dot stimulus was  
733 presented for the durations mentioned above, after which it was removed from the screen. The  
734 monkey was asked to report the net direction of motion (0 or 180 degrees) by reaching to the target  
735 in the corresponding direction. The difficulty of the task was adjusted by changing the fraction of  
736 dots moving coherently in one direction (motion strength). After stimulus offset the monkey either  
737 entered a delay period during which it was required to withhold his response for 400-900 ms (on  
738 30% of the open-loop trials) or was immediately presented the go cue (on 70% of the open-loop  
739 trials and all closed-loop trials). The go cue was then signaled by the offset of the FP at which  
740 point the monkey was free to gaze anywhere and report his decision with his arm by reaching one  
741 of the two targets. Although gaze was monitored, reward acquisition depended solely on reaching  
742 to the correct target. Finally, for a response to be considered valid, the monkey was required to  
743 hold its hand position within +/- 4 degrees of the center of the target for 200 ms. The monkey was  
744 then rewarded with a drop of juice for correct choices and given a timeout (2-4 seconds) for  
745 incorrect ones. Zero coherence trials were rewarded randomly with a probability of 0.5 since there  
746 was no correct response on these trials. The motion discrimination task was run on an Apple Mac  
747 Pro running Mac OS.

748

749 **Random dots stimuli**

750

751 The stimuli used in our psychophysical experiment were random dot kinematograms (RDK)  
752 generated using MATLAB and Psychophysics Toolbox. The details for generating the random  
753 dots stimuli have been described previously<sup>10</sup>. However, to allow for closed loop experiments 1  
754 and 2 (see below) we introduced a modification to be able to terminate the dot presentations early  
755 if needed. The stimulus code was designed to precompute a sequence of kinematograms that  
756 contain both random and moving dots. The sequence was then presented ballistically with no need  
757 to continuously compute the content of each frame. Our modification allowed for DV values to be  
758 received asynchronously from the real-time decoder and evaluated during the dots presentation. If  
759 the DV criteria defined by the particular experiment were met, the dot presentation could then be  
760 terminated without the remaining frames being shown. For the experiment in which an additional  
761 pulse of motion energy was injected (closed loop experiment 3, see below), we arranged for two  
762 sequences of kinematograms to be precomputed before presentation: one without the pulse, the  
763 other for the 200 ms pulse itself. Contingent on the evolution of DV values, the stimulus could  
764 then be rapidly switched from the standard sequence to the pulse sequence.

765

766 For both monkeys, the motion strength could take one of 6 possible values within a set, but the  
767 sets were slightly different between subjects: [0%, 1.6%, 3.2%, 6.4%, 12.8%, 25.6%] for monkey  
768 H and [0%, 3.2%, 6.4%, 12.8%, 25.6%, 51.2%] for monkey F. The top coherence (51.2%) was  
769 dropped and a very low coherence (1.6%) was introduced for monkey H, due to its superior  
770 discrimination ability. The direction and coherence of the motion were randomly assigned on each  
771 trial by sampling from a uniform distribution with replacement. For zero-coherence stimuli all dots  
772 were displaced randomly but, due to the stochasticity of that process, one obtains non-zero net  
773 motion toward the targets over a small number of frames.

774

## 775 **Behavioral Training**

776

777 Both monkeys had been extensively trained on fixed and variable duration versions of the motion  
778 discrimination task using an arm reach movement as the operant response prior to the current  
779 study<sup>10</sup>. A few training sessions (all open-loop trials) were used to get the subject accustomed to  
780 the new task timing (0.5-1.2 s stimuli and no delay on 70% of the trials). Real time decoding  
781 sessions only started when psychophysical performance was stable.

782

## 783 **Behavioral Analysis**

784

785 Psychophysical performance was assessed in two ways: by describing the percentage of correct  
786 choices as a function of (unsigned) stimulus coherence and by describing the percentage of  
787 rightward choices as a function of signed stimulus coherence.

788

789 The percentage of correct choices as a function of motion strength (stimulus coherence) was fit by  
790 a cumulative Weibull distribution function:

791

$$792 \quad P_{correct}(c) = 1 - 0.5 \times e^{(-\frac{c}{\alpha})^\beta}$$

793

794 where  $P_{correct}$  is probability correct,  $c$  is motion strength,  $\alpha$  is the psychophysical threshold (the  
795 value of  $c$  that corresponds to ~82% correct responses), and  $\beta$  is a parameter that controls the shape  
796 of the function, especially its steepness.

797

798 The proportion of rightward choices,  $P_{right}$ , as a function of motion strength and direction was fit  
799 by a logistic regression:

800

$$801 \quad P_{right}(c) = \frac{1}{1 + e^{-\beta_1 \times (\beta_0 + c)}}$$

802

803 where  $c$  is motion strength,  $\beta_1$  is the slope parameter and  $-\beta_0$  is the motion strength corresponding  
804 to the indifference point. This value was used to assess the monkey's behavioral bias on each  
805 session.

806

### 807 **Electrophysiological recordings**

808

809 Two multielectrode arrays (Blackrock Microsystems, Utah) with 96 electrodes each (1mm long  
810 platinum-iridium electrodes, 0.4 mm spacing, impedance average of approximately 400 KOhm)  
811 were implanted in primary motor and dorsal premotor cortex of each monkey (Figure 1c). The  
812 methods for determining the array placement were described in our previous study<sup>10</sup>. For monkey  
813 F, the M1 array became unusable between the end of the previous study and the start of the current  
814 study. Due to lack of neural signal from the M1 array, only the PMd array was used for this animal.  
815 Continuous neural data were acquired and saved to disk from each channel (sampling rate 30 kHz)  
816 and thresholded at -4.5 RMS using the Cerebus recording system (Blackrock Microsystems, Utah)  
817 and two separate PCs (one for each array) running Windows 8. Waveforms corresponding to  
818 threshold crossings were not sorted and each channel could contain one or more unit(s). Sorting  
819 waveforms would require a significant lead-up time before the beginning of the experiment and

820 could negatively affect the ability to combine data and use decoders across days (see below,  
821 Decoder training). Since units were not isolated within each channel our resulting units were most  
822 likely multi-unit clusters. Any extremely noisy channels were deactivated at the beginning of a  
823 session, and all other channels were used in this study. Using only multi-units yielded comparable  
824 prediction accuracy (Extended Data Figure 3) to our previous study<sup>10</sup> in which both single and  
825 multi-unit data was used.

826

## 827 **Datasets**

828

829 Data were collected in two sets of experiments. In the first set of experiments we performed Closed  
830 Loop Experiments 1 and 2 (see below). For this set, for each monkey we analyzed all datasets that  
831 met two behavioral inclusion criteria: 1) over 500 trials and 2) a behavioral bias ( $|\beta_0|$ ) under 4%,  
832 as determined by a logistic regression fit (see above). These criteria were imposed to ensure that  
833 we have a sizeable number of trials per condition (6 coherence x 2 directions = 12 conditions) and  
834 that the behavior of the monkey is virtually unbiased, such that both neural and behavioral results  
835 are more easily interpretable. These criteria resulted in a selection of 17/15 sessions for a total of  
836 16468/15826 trials for monkey H/F, respectively.

837

838 In the second set of experiments we performed Closed Loop Experiment 3. This set of experiments  
839 was performed later, on separate sessions, but using the same two subjects, arrays and decoding  
840 techniques as the first set. In this set of experiments, we analyzed all datasets with over 550 trials.  
841 For all experiments in monkey H, PMD and M1 were recorded simultaneously.

842

## 843 **Decoder training**

844

845 We chose to use a logistic regression classifier based on our previous results showing excellent  
846 offline prediction accuracy in variable duration tasks<sup>10</sup> and because of the direct probabilistic  
847 interpretation of its output. Our decision variable (DV) was defined as the log odds ratio of  
848 observing a particular behavioral choice ( $T_1$  or  $T_2$ ) given the population response  $\vec{r}$ :

$$849 \quad DV = \log \frac{P(T_1|\vec{r})}{P(T_2|\vec{r})} = \beta_0(t) + \sum_{i=1}^n \beta_i(t) \times r_i(t)$$

850

851 Where  $r_i(t)$  are the z-scored summed spike counts for each neuron and time window,  $\beta_0$  is an  
852 intercept term and  $\beta_i(t)$  are the classifier weights (one for each unit and epoch). Data from all  
853 electrodes with valid waveforms were combined.

854

855 For simplicity, we decided to use only 3 different decoders for an entire trial (Fig. 1a), instead of  
856 a different one for each 50 ms time window in the trial<sup>10</sup>. We applied the first decoder from fixation  
857 up to and including the dots period, the second for the delay period and the third for the post go  
858 cue period. After extensive offline tests on a few sessions the precise epochs for classifier training  
859 were defined as the following:

860

- 861 • Dots epoch: [150, 1000] ms aligned to dots onset;
- 862 • Delay epoch: [250, 350] ms aligned to dots offset;
- 863 • Post-go cue epoch: [200,400] ms aligned to go cue;

864

865 LASSO regularization was applied to prevent over-fitting when calculating each set of beta



866 weights. A Lambda parameter constraining the L1 norm of the Beta vectors was calculated  
867 separately for each of the 3 decoders using 10-fold cross validation on the corresponding time  
868 epochs listed above. For each decoder the Lambda value with minimum cross-validation error was  
869 chosen. Extended Data Figure 5b shows beta weights for an example set of 3 decoders for monkey  
870 H sorted by epoch and ranked by magnitude. Positive weights correspond to rightward preferring  
871 channels while negative weights correspond to leftward preferring channels. LASSO  
872 regularization sets weights of channels with little or no predictive activity to zero.

873  
874 The linear classifier was determined offline using recently collected data (from real-time  
875 experiments). All 50 ms samples of neural data during the selected period (above) for each epoch  
876 were used to train the classifier. The classifier was trained on 90% of the trials and tested on 10%  
877 of the trials using 10-fold cross-validation. The weights from one of the cross-validation folds were  
878 then used in the upcoming real-time experiments. Decisions to train new decoders were based on  
879 experimenter judgment in attempts to optimize performance: if a substantial decrease in real-time  
880 decoding performance and/or an increase in the DV offset at baseline was observed, a new  
881 classifier was trained and used in the following session. New classifiers were typically used every  
882 5 sessions, but some proved to be stable over up to 14 sessions (Extended Data Figure 5a).

883  
884 **Real time decoding**

885  
886 An essential requirement to compute a real-time read-out of neural activity is the ability to  
887 continuously and (nearly) instantaneously access and perform computations on the neural activity  
888 being recorded. To accomplish this, the spikes for each channel were temporally smoothed using

889 a causal half-Gaussian kernel with 50 ms standard deviation (to mitigate spurious Poisson  
890 fluctuations) and summed for the most recent 50 ms. These smooth spike counts were then stored  
891 in a 192x1 (96x1 for monkey F) vector of neural activity and z-scored individually for each  
892 channel, using previously calculated  $\mu$  (mean) and  $\sigma$  (standard deviation) vectors. Z-scoring neural  
893 activity was crucial to ensure a reliable and stable real-time readout by preventing the highest firing  
894 channels from dominating it. Finally, the z-scored neural activity was projected onto a previously  
895 calculated linear decoder (a set of  $\beta$  weights, one for each channel) to obtain our linear readout of  
896 internal decision state: a real time decision variable (DV)<sup>1</sup>.

897

898 The value of the DV was updated every 10 ms, reflecting the neural activity of the preceding 50  
899 ms. Because we used a half-gaussian kernel, data preceding the 50 ms window also influenced our  
900 DV estimate (with more recent spikes carrying more weight). 95% of the data contributing to the  
901 spike counts was limited to the last 100 ms (i.e an additional 50 ms in the past to each 50 ms  
902 window). The DV value and its history on a single trial could then be used (if desired) to impose  
903 conditions for termination of the random dots stimulus (experiments 1 and 2) or presentation of a  
904 motion pulse (experiment 3), effectively closing the loop on the experiment.

905

906 While the  $\beta$  weights were not updated online (during the course of one experiment), the  $\mu$  and  $\sigma$   
907 vectors for each epoch were learned continuously during the course of the experiment, due to  
908 changing recording conditions and signals from day to day. The  $\mu$  and  $\sigma$  vectors were initialized  
909 at the beginning of the session using the values calculated offline when training the most recent  
910 decoder. Once the session started, the initial  $\mu$  and  $\sigma$  vectors were blended with online calculated  
911 values for the first 25 trials, using a blending factor  $\alpha$ :

912

913  $\alpha_j = \max((25 - j)/25, 0)$ , where  $j$  is the trial number.

914

915 For trial  $j$ , sample number  $t$  and for a given epoch in trial, the  $\mu$  and  $\sigma$  vectors were defined as a  
916 weighted mixture between the initial values  $\mu_{\text{initial}}(\text{epoch})$  and  $\sigma_{\text{initial}}(\text{epoch})$  and the estimate of the  
917 current session's values  $\mu_{\text{current}}(t, \text{epoch})$  and  $\sigma_{\text{current}}(t, \text{epoch})$ :

918  $\mu_{\text{blended}}(t, \text{epoch}) = \alpha_j * \mu_{\text{initial}}(\text{epoch}) + (1 - \alpha_j) * \mu_{\text{current}}(t, \text{epoch})$

919  $\sigma_{\text{blended}}(t, \text{epoch}) = \alpha_j * \sigma_{\text{initial}}(\text{epoch}) + (1 - \alpha_j) * \sigma_{\text{current}}(t, \text{epoch})$

920

921 After the first 25 trials  $\alpha$  was set to zero which implies the  $\mu$  and  $\sigma$  vectors kept being continuously  
922 updated throughout the session but were no longer blended with values from the previous days.

923 The update rule for  $\mu_{\text{current}}(t, \text{epoch})$  was:

924 
$$\mu_{\text{current}}(t, \text{epoch}) = \frac{[\mu_{\text{current}}(t - 1, \text{epoch})] * K + r}{K + 1}$$

925 
$$K = N_{\text{samples}}(t, \text{epoch})$$

926 where  $r$  is the most recently sampled vector of spike counts and  $K$  is the current number of samples  
927 of spike count vectors obtained so far for this particular epoch.

928 The update rule for  $\sigma_{\text{current}}(t, \text{epoch})$  was:

929 
$$\sigma_{\text{current}}(t, \text{epoch}) = \sqrt{\frac{K - 1}{K} * \sigma_{\text{current}}^2(t - 1, \text{epoch}) + \frac{1}{K} * (r - \mu_{\text{current}}(t, \text{epoch}))^2}$$

930 After updating the  $\mu_{\text{current}}(t, \text{epoch})$  and  $\sigma_{\text{current}}(t, \text{epoch})$  vectors, the number of  
931 samples for the corresponding epoch was also updated:

932

933 
$$N_{samples}(t, epoch) = N_{samples}(t - 1, epoch) + 1$$

934

935 Importantly, even though we had only 3 different decoders (Fig. 1b) we effectively used 5 different  
936 epochs: Fixation, Targets, Dots, Delay and Post Go-Cue. The Dots decoder was also used in the  
937 Fixation and Targets epochs but because average firing rates are different between these, different  
938  $\mu$  and  $\sigma$  vectors had to be used. Every 50 ms sample of neural data for a given epoch was used to  
939 update the corresponding  $\mu$  and  $\sigma$  vectors as described above. We let the  $\mu$  and  $\sigma$  vectors converge  
940 for ~200-300 trials, in the beginning of each experimental session, before starting any closed loop  
941 experiments. One way to check for this convergence was to monitor the DV offset: the average  
942 DV value for the first 150 ms of the Dots epoch. Since we verified through offline analyses that  
943 no systematic pre-planning activity towards one of the two targets was present in PMd or M1  
944 during this time window, we expected the DV offset to be on average ~0.

945

946 Using a single decoder for an entire epoch was far more efficient to implement than using a  
947 different decoder for each time point (as it reduced the number of  $\mu$  and  $\sigma$  vectors that had to be  
948 learned online) and as demonstrated in our previous study<sup>10</sup> a single classifier for an entire epoch  
949 was almost as predictive as multiple classifiers trained on different timepoints of the same epoch<sup>10</sup>.  
950 Because choice modulation in PMd/M1 changes dramatically around the peri-movement period a  
951 single decoder for an entire trial was not feasible.

952

953 In the end, our method yielded a reliable real-time decision state read out and required only ~18%  
954 (15%) of trials in a session for calculating the values of  $\mu$  and  $\sigma$  for monkey H (F), leaving the  
955 remainder available for imposing neurally contingent conditions in closed loop. The real time

956 decoder was run on two separate PCs (server and client) using the Simulink Real-Time/xPC  
957 platform (Mathworks, Massachusetts).

958

## 959 **Closed Loop Experiments**

960

### 961 *Experiment 1: Virtual Boundaries*

962

963 On each trial we set a virtual threshold, or boundary (B), for the magnitude of the DV during the  
964 dots epoch. If the DV on the current trial reached B or  $-B \pm$  tolerance, the dots presentation was  
965 terminated and the monkey asked to report its decision. If the bound was not reached on a given  
966 trial, stimulus presentation continued to a preset duration for that trial which was randomly  
967 sampled from an exponential distribution ranging from 500-1200 ms. Closed loop trials for which  
968 the boundary was not reached were effectively indistinguishable from open loop trials.

969

970 Typically, 5 values for boundaries spanning 0.5 to 5 (DV units) were used every session and one  
971 of them was randomly assigned on each trial (uniform distribution). The tolerance used was  $\pm$   
972 0.25 DV units. We imposed a minimum duration for all trials to avoid spurious bound crossings,  
973 which could be problematic for low bound values in particular. In all sessions the minimum  
974 duration was 250 ms, a conservative estimate of the latency for choice related signals driven by  
975 the visual stimulus to appear in PMd and M1.

976

977 After the minimum stimulus duration was reached, the DV was assessed every 10 ms to determine  
978 whether it fell within  $\pm 0.25$  DV units of the bound chosen for the current trial (B or  $-B$ ). If so, the

979 stimulus was terminated within 34 ms of the boundary being met (see Estimated latency for real  
980 time closed loop setup). If the bound for the particular trial was not reached, the presentation  
981 continued up to the maximum stimulus duration selected for that trial which had been obtained by  
982 randomly sampling from an exponential distribution: 500-1200 ms (median 670 ms).

983

984 Finally, closed loop trials were randomly interleaved with open loop trials in which no DV-  
985 dependent termination condition was imposed. The motivation for interleaving closed loop and  
986 open loop trials was to make it extremely hard for the monkey to learn that accelerating the  
987 dynamics of choice related signals<sup>10</sup> (potentially by recruiting more choice related neurons or  
988 increasing their modulation) and thus hitting bounds sooner could potentially increase its reward  
989 rate. Not accounting for this possibility could lead to an undesirable change in the monkey's  
990 strategy during the course of the closed loop experiments, which could become problematic when  
991 combining data across days.

992

### 993 *Experiment 2: CoM detection*

994

995 Under our logistic regression framework, the signature of a putative CoM is a sign change of the  
996 decision variable. Since these sign changes could happen at any time during the trial, capturing  
997 them required not only monitoring the most recent state of the DV, but its history throughout the  
998 trial. Because there was noise in our DV estimation and DVs usually started close to 0 at the  
999 beginning of the trial we imposed selection criteria to detect likely CoMs based on the neural data.  
1000 A necessary feature for all potential CoMs was a zero crossing in the sign of the DV: change of  
1001 DV sign from negative to positive reflected a change in the likelihood of a rightward decision from

1002 less than 50% to greater than 50%, and vice versa for the opposite change in sign. To eliminate  
1003 zero crossings resulting solely from measurement noise, we imposed four additional criteria:

1004

- 1005 • Minimum DV value after zero crossing;
- 1006 • Minimum DV value with opposite sign before zero crossing;
- 1007 • Minimum duration of DV sign stability after zero crossing;
- 1008 • Minimum duration of DV sign stability before zero crossing;

1009

1010 The minimum DV values before and after zero crossing were symmetrical for most sessions, as  
1011 were the periods of minimum duration of DV sign stability (negative or positive values for all time  
1012 points). If a zero crossing was detected and all four criteria were met, the stimulus presentation  
1013 was interrupted and the animal was virtually immediately (within 34 ms or less, see Estimated  
1014 latency for real time closed loop setup) prompted to report a decision. The exact parameters used  
1015 for each session can be found in Supplementary Information Table 3.

1016

1017 By sweeping the parameter space we could test zero crossings that differed in magnitude and  
1018 stability. Analogously to the virtual boundary experiment, if the minimums were not met and a  
1019 CoM thus not detected, the stimulus presentation continued uninterrupted for a random duration  
1020 ranging from 500-1200 ms, selected prior to the start of the trial. A minimum stimulus duration of  
1021 250 ms was also in place.

1022

1023 Because putative CoMs are quite rare<sup>1</sup>, in the first set of experiments we devoted 70% of the closed  
1024 loop trials to detect them leaving the remaining 30% as virtual boundary trials. The exact fraction

1025 of trials with CoM depends dramatically on how we parameterize them. The longer the minimum  
1026 periods of consistent sign and the higher the minimum DV value in the initial commitment stage,  
1027 the rarer they become. Running both experiments on the same sessions ensured that the mapping  
1028 from DV to choice likelihood was held during the CoM experiments and provided the most faithful  
1029 indirect validation of initial commitment we could obtain.

1030

### 1031 *Experiment 3: Motion pulse perturbation*

1032

1033 In this experiment, motion pulses were introduced on some trials with motion coherences near or  
1034 below psychophysical threshold. No motion pulses were presented for suprathreshold coherences  
1035 based on the results of a pilot experiment (not shown) in which pulses presented at suprathreshold  
1036 coherences were more perceptually salient and led to changes in the animals' strategy. As in  
1037 Experiment 1, on each trial we set a virtual boundary (B) for the magnitude of the DV during the  
1038 dots epoch. In this experiment, 100% of trials with dots coherence at or near psychophysical  
1039 threshold were treated as closed loop trials (this corresponds to trials with maximum unsigned  
1040 coherence of 6.4% for monkey H and 12.8% for monkey F; psychophysical thresholds were  
1041 measured using the Weibull function described above in "Behavioral Analysis"). Low-coherence  
1042 trials in which the boundary was not reached (per the criteria below) and trials with suprathreshold  
1043 dots coherences were all effectively open loop.

1044

1045 If the DV on a closed loop trial reached B or  $-B \pm \text{tolerance}$  ( $\pm 0.25$  DV units), after a minimum  
1046 stimulus duration of 50 ms, a 200-ms motion pulse was presented, followed immediately by  
1047 termination of the visual stimulus and presentation of the cue for the monkey to report its decision.



1048 If not, dots presentation continued for a pre-assigned duration drawn randomly from an  
1049 exponential distribution of 500-1200 ms. Four integer values for boundaries (spanning 1 to 4 DV  
1050 units) were used every session, and one of them was randomly assigned on each trial (uniform  
1051 distribution).

1052

1053 Motion pulses were 200-ms periods of additional dots stimulus presentation with small additive  
1054 average coherence ( $\pm 2\%$  or  $4.5\%$  from the initial dots coherence on the same trial for monkey H  
1055 and F, respectively, where positive coherence values indicate rightward motion); thus pulses  
1056 effectively randomly added either a small amount of rightward or leftward motion evidence to the  
1057 stimulus. Pulse strength was calibrated in pilot experiments, in which we converged upon  
1058 coherence shifts that slightly but significantly biased each animal's behavior, without being overtly  
1059 perceptually salient (biases were measured using the logistic regression on rightward choice  
1060 described above in "Behavioral Analysis"). Animals were rewarded for correct reaches in the  
1061 direction of the coherence of the initial dots stimulus (randomly assigned on 0% coherence trials),  
1062 regardless of the pulse direction.

1063

1064 *Estimated latency for real time closed loop setup*

1065

1066 To validate our setup, we measured the latency between a neural condition being met and the  
1067 corresponding task change being implemented. We tested this latency by generating simulated DV  
1068 steps in the same model used to detect when DV triggering conditions were met in the real  
1069 experiments. We used these simulated steps to trigger the onset of a bright light on the touchscreen  
1070 in front of a photodetector, again within the same code used to run the task and generate the stimuli

1071 in the real experiments. We then passed both the simulated DV and the photodetector output  
1072 signals into an oscilloscope, triggered the display on the “DV” steps, and manually measured the  
1073 delay to onset of the bright dot. Almost all measured delays were within 2 frames, or 26 ms.

1074

1075 *Estimated trial count savings for real time closed loop setup*

1076

1077 The real time setup allowed for extremely precise experimental control over which DV values or  
1078 DV history to use to trigger a modification in the task (stimulus termination or pulse). However, it  
1079 could be argued that given enough data, similar trials would have been captured simply by either  
1080 terminating the stimulus (as in experiments 1 and 2) or presenting the pulse (as in experiment 3)  
1081 at a random point in the trial and then back sorting them offline (by DV value or history by after  
1082 the data is collected).

1083

1084 To estimate how much more trial-count efficient it was to use our real time setup compared to  
1085 offline back-sorting trials where the stimulus was presented for a random duration, we used the  
1086 CoM experiment as a case study given how rare change of mind events are.

1087

1088 For simplicity, we focused on sessions 1, 2 and 3 from Monkey F, which all have the same (and  
1089 intermediate) CoM requirements (Supplementary Information Table 3). We started by calculating  
1090 the yield from the real time experiment in closed loop as the ratio between detected CoM trials and  
1091 trials in which CoMs were checked (i.e. all closed loop trials in which the stimulus could be  
1092 terminated if the conditions dictated by the CoM parameters were met, Supplementary Information  
1093 Table 3):

1094 
$$Yield_{CL} = \#CoMs\ detected / \#trials\ CoMs\ checked = 11.91\%$$

1095

1096 To calculate the yield for offline back-sorting trials we used the open loop trials in the same  
1097 sessions, which were terminated after a random stimulus duration. Importantly, the stimulus  
1098 duration on these open loop trials was sampled from the same distribution as for the closed loop  
1099 trials in which CoMs were checked, which allows for a fair yield comparison. We calculated the  
1100 yield from offline back-sorting as the ratio between the number of trials that would have met all  
1101 the criteria for CoMs for the same session and the total number of open loop trials:

1102

1103 
$$Yield_{OL} = \#Valid\ putative\ CoMs / \#Open\ loop\ trials = 1.85\%$$

1104

1105 Since the goal would be to probe the new choice preference shortly after the zero crossing (putative  
1106 change of mind), not many hundreds of ms later, we only considered CoM trials that were (closed  
1107 loop) or that would have been (open loop) terminated within 150 ms of the zero crossing. This  
1108 cutoff value corresponded to the 82<sup>nd</sup> percentile of post zero crossing durations for the closed loop  
1109 trials analysed in these sessions.

1110

1111 In this analysis  $Yield_{CL}$  was 6.43 times higher than  $Yield_{OL}$ . This result implies that had we not  
1112 used a real time setup in closed loop we would have had to collect 6.43 times the number of trials  
1113 (and thus sessions) to obtain the same number of events. This would in turn mean collecting  
1114 around 100 sessions/monkey just for experiments 1 and 2 (assuming the same 30%/70% trial split  
1115 used in the real time experiments), rendering this experiment practically unfeasible.

1116

## 1117 **Neural Data Analysis**

1118

### 1119 *DV variability*

1120

1121 Within trial variability was computed by first calculating the difference between consecutive DV  
1122 values (estimated every 10 ms) for every trial in the datasets collected for experiments 1 and 2  
1123 (open and closed loop). This step yielded a  $\Delta$ DV trace for each trial aligned to dots onset. For each  
1124 trial these traces were computed only up to the offset of the stimulus and did not include any delay  
1125 or post go-cue DV data. The  $\Delta$ DV traces were then sorted and averaged for each choice (Fig. 5a,  
1126 Extended Data Fig.7a) or each signed coherence level (Fig. 5b, Extended Data Fig.7b). Longer  
1127 trials are increasingly rare due to the shape of our stimulus duration distribution but this asymmetry  
1128 does not influence the interpretation of the time course of average  $\Delta$ DV as this metric only captures  
1129 *within* trial variability and not *across* trial variance.

1130

### 1131 *DV and motion energy correlation*

1132

1133 Motion energy (ME) was calculated for each trial in the datasets collected for experiments 1 and  
1134 2 (open and closed loop) by convolving the positions of the dots in the stimulus with spatio-  
1135 temporal filters as previously described<sup>8</sup>. The ME trace obtained for each trial captures the strength  
1136 of the stimulus at every timepoint during the stimulus presentation. To evaluate the effect of motion  
1137 energy on DV we performed a linear regression of single trial DV traces on single trial ME traces.  
1138 From experiments 1 and 3 we determined that due to neural latencies a stimulus fluctuation can  
1139 only have effect on the decoded DV ~180 ms later. For this reason, the regression was always

1140 performed between DV(t) and ME(t-180ms) or earlier. For Extended Data Fig. 8a-b each green  
1141 trace corresponds to a different way to estimate the motion energy that might affect DV at time t.  
1142 For the lightest trace and for every timepoint t ME was averaged between (t-180ms) and (t-200ms)  
1143 for every trial and used to regress against DV(t). A separate regression was performed for each  
1144 timepoint and the resulting variance explained was plotted. The same process then was repeated  
1145 for every other green trace by progressively increasing the averaging window for ME in 20 ms  
1146 increments from (t-180, t- 200) ms to (t-180, t- 500) ms. As a control the DV was also regressed  
1147 against signed coherence for each trial (Extended Data Fig. 8a-b grey traces). This analysis was  
1148 used to assess how much of the DV variance *across* coherences is explained by motion energy or  
1149 signed coherence as a function of time. To assess how much DV variance *within* each coherence  
1150 level could be explained by the motion energy of the stimulus we first sorted the DV traces for  
1151 each signed coherence level. For each signed coherence level and each timepoint we regressed  
1152 DV(t) against ME(t-180ms) for the corresponding trials and calculated the variance explained  
1153 (Extended Data Fig. 8c-d).

1154

### 1155 *CoM regularities*

1156

1157 To test whether the effects of coherence on the number of CoMs were statistically significant we  
1158 used a bootstrap method to generate 1000 distributions of CoM events with the corresponding  
1159 coherences by sampling with replacement from the distribution of captured events for each subject  
1160 separately. For each subject each distribution had the same number of observations as those  
1161 captured in experiment 2: 985 for monkey H and 1727 for monkey F. For each randomly sampled  
1162 distribution the number of CoMs for each coherence level was counted. The resulting counts were

1163 then regressed against the coherence level they belonged to. CoM count was highly and negatively  
1164 correlated with coherence for both subjects ( $p < 0.001$ ).

1165 To test whether the effect of directionality of CoMs (corrective vs erroneous) was statistically  
1166 significant we followed a similar bootstrapping procedure and generated 1000 distributions of  
1167 CoM events (excluding 0% trials) with the corresponding directionality. For each randomly  
1168 sampled distribution the number of CoMs for each direction was counted. The difference between  
1169 the medians counts of corrective and erroneous CoMs was tested by performing a one-sided  
1170 Wilcoxon rank sum test ( $p < 0.001$ ) testing the hypothesis that corrective counts were higher than  
1171 erroneous counts.

1172

### 1173 *Pulse Effects*

1174

1175 To quantify the overall behavioral effect of the pulses, we performed the following logistic  
1176 regression on the probability of a rightward choice:

1177

$$1178 \quad P_{right}(c) = \frac{1}{1 + e^{-\beta_1 \times (\beta_0 + \beta_{pulse} D + c)}}$$

1179

1180 where  $c$  is motion strength,  $\beta_1$  is the slope parameter,  $D$  is the pulse direction, and  $-\beta_0$  is the motion  
1181 strength corresponding to the indifference point.

1182

1183 To determine the effect of the pulse on the evolving DV, we first estimated the minimum latency  
1184 for the visual stimulus information to influence the DV by calculating the first time of significant  
1185 divergence of rightward vs. leftward DV traces during dots presentation on open-loop trials with

1186 stimuli of maximal motion strength ( $\pm 25.6\%$ ,  $51.2\%$  coherence for monkey H, F), assessed using  
1187 a two-sample t-test with correction for a false discovery rate of  $0.05^{34}$ . We refer to this estimate as  
1188 the “evidence representation latency” (ERL; 170 ms, 180 ms for monkey H, F). We then measured  
1189 the evolution of the DV after pulse presentation by calculating the difference between the  
1190 empirically observed DV at each time point  $t$  and the DV at the “pulse evidence representation  
1191 latency” (PERL, or time of pulse onset plus the ERL):

1192

$$1193 \quad \Delta DV(t) = DV(t) - DV_{PERL}.$$

1194

1195 To quantify the pulse effect on DV on single trials, we calculated the slope (using linear regression)  
1196 of  $\Delta DV$  over the time period beginning with the PERL and ending at either the median go-RT for  
1197 the animal or 150 ms prior to movement initiation on that trial, whichever came first, to minimize  
1198 the contribution of directly movement-related activity to our analysis of the evolving choice<sup>10</sup>. We  
1199 checked to ensure the results did not depend critically on these specific endpoint criteria by  
1200 sweeping a range of endpoints for the  $\Delta DV$  calculation: every 10 ms from go cue onset to 150 ms  
1201 after the go cue. The exact endpoint used did not affect the results of the following analyses  
1202 (quantitative results held for all endpoints from the time of the go cue through 150 ms post-go-cue  
1203 for monkey H, and for endpoints beginning 120 ms post-go-cue for monkey F).

1204

1205 To quantify the neural pulse effect at each DV boundary (as in Fig. 5e), we fit the following linear  
1206 regression on the  $\Delta DV$  slope (calculated as described in the previous paragraph) separately for  
1207 each DV boundary:

1208

1209 
$$\Delta DV \text{ slope}^B = \beta_0^B + \beta_{coh}^B \times c + \beta_{time}^B \times time_{pulse \text{ onset}} + \beta_{pulse}^B \times D$$

1210 
$$+ \beta_{pulse \times time}^B \times (time_{pulse \text{ onset}} \times D),$$

1211

1212 where  $B$  is the pulse-triggering DV boundary (unsigned), and compared  $\beta_{pulse}^B$  values. (The full

1213 resulting sets of regression coefficients fit to  $\Delta DV$  slope can be found in Supplementary

1214 Information Table 1.)

1215

1216 Similarly, to quantify the behavioral pulse effect at each DV boundary (as in Fig. 5f), we fit the

1217 following logistic regression on the probability of a rightward choice separately for each DV

1218 boundary:

1219 
$$P_{right}^B(c) = \frac{1}{1 + e^{-(z^B)'}}$$

1220 where  $z^B = \beta_0^B + \beta_{coh}^B \times c + \beta_{time}^B \times time_{pulse \text{ onset}} + \beta_{pulse}^B \times D$

1221 
$$+ \beta_{pulse \times time}^B \times (time_{pulse \text{ onset}} * D),$$

1222

1223 where  $B$  is again the pulse-triggering DV boundary (unsigned), and compared  $\beta_{pulse}^B$  values. (The

1224 full resulting sets of regression coefficients fit to choice can be found in Supplementary

1225 Information Table 2.)

1226

1227 **Data availability**

1228

1229 All data and analyses generated during the current study are available from the corresponding

1230 authors upon reasonable request.



1231

1232 **Code availability**

1233

1234 The analysis code was developed in Matlab (Mathworks) and is available from the corresponding  
1235 authors upon reasonable request.

1236

1237

1238

1239

1240

1241 **References**

1242

1243 1 Kiani, R., Cueva, C. J., Reppas, J. B. & Newsome, W. T. Dynamics of neural population  
1244 responses in prefrontal cortex indicate changes of mind on single trials. *Curr Biol* **24**,  
1245 1542-1547, doi:10.1016/j.cub.2014.05.049 (2014).

1246 2 Kaufman, M. T., Churchland, M. M., Ryu, S. I. & Shenoy, K. V. Vacillation, indecision  
1247 and hesitation in moment-by-moment decoding of monkey motor cortex. *Elife* **4**, e04677,  
1248 doi:10.7554/eLife.04677 (2015).

1249 3 Bollimunta, A., Totten, D. & Ditterich, J. Neural Dynamics of Choice: Single-Trial  
1250 Analysis of Decision-Related Activity in Parietal Cortex. *The Journal of Neuroscience*  
1251 **32**, 12684 (2012).

- 1252 4 van den Berg, R. *et al.* A common mechanism underlies changes of mind about decisions  
1253 and confidence. *eLife* **5**, e12192, doi:10.7554/eLife.12192 (2016).
- 1254 5 Lemus, L. *et al.* Neural correlates of a postponed decision report. *Proceedings of the*  
1255 *National Academy of Sciences* **104**, 17174, doi:10.1073/pnas.0707961104 (2007).
- 1256 6 Rich, E. L. & Wallis, J. D. Decoding subjective decisions from orbitofrontal cortex. *Nat*  
1257 *Neurosci* **19**, 973-980, doi:10.1038/nn.4320 (2016).
- 1258 7 Resulaj, A., Kiani, R., Wolpert, D. M. & Shadlen, M. N. Changes of mind in decision-  
1259 making. *Nature* **461**, 263, doi:10.1038/nature08275  
1260 <https://www.nature.com/articles/nature08275#supplementary-information> (2009).
- 1261 8 Kiani, R., Hanks, T. D. & Shadlen, M. N. Bounded integration in parietal cortex  
1262 underlies decisions even when viewing duration is dictated by the environment. *J*  
1263 *Neurosci* **28**, 3017-3029, doi:10.1523/JNEUROSCI.4761-07.2008 (2008).
- 1264 9 Britten, K. H., Shadlen, M. N., Newsome, W. T. & Movshon, J. A. The analysis of visual  
1265 motion: a comparison of neuronal and psychophysical performance. *J. Neurosci.* **12**,  
1266 4745-4765 (1992).
- 1267 10 Peixoto, D. *et al.* Population dynamics of choice representation in dorsal premotor and  
1268 primary motor cortex. *bioRxiv* (2018).
- 1269 11 Shadlen, M. N. & Newsome, W. T. Neural Basis of a Perceptual Decision in the Parietal  
1270 Cortex (Area LIP) of the Rhesus Monkey. *J Neurophysiol* **86**, 1916-1936 (2001).
- 1271 12 Ratcliff, R. & McKoon, G. The Diffusion Decision Model: Theory and Data for Two-  
1272 Choice Decision Tasks. *Neural Computation* **20**, 873-922, doi:10.1162/neco.2008.12-06-  
1273 420 (2007).

- 1274 13 Mazurek, M. E. A Role for Neural Integrators in Perceptual Decision Making. *Cerebral*  
1275 *Cortex* **13**, 1257-1269, doi:10.1093/cercor/bhg097 (2003).
- 1276 14 Lo, C.-C. & Wang, X.-J. Cortico-basal ganglia circuit mechanism for a decision threshold  
1277 in reaction time tasks. *Nat Neurosci* **9**, 956-963,  
1278 doi:[http://www.nature.com/neuro/journal/v9/n7/supinfo/nn1722\\_S1.html](http://www.nature.com/neuro/journal/v9/n7/supinfo/nn1722_S1.html) (2006).
- 1279 15 Usher, M. & McClelland, J. L. The time course of perceptual choice: The leaky,  
1280 competing accumulator model. *Psychological Review* **108**, 550-592, doi:10.1037/0033-  
1281 295X.108.3.550 (2001).
- 1282 16 Cisek, P., Puskas, G. A. & El-Murr, S. Decisions in Changing Conditions: The Urgency-  
1283 Gating Model. *The Journal of Neuroscience* **29**, 11560 (2009).
- 1284 17 Huk, A. C. & Shadlen, M. N. Neural Activity in Macaque Parietal Cortex Reflects  
1285 Temporal Integration of Visual Motion Signals during Perceptual Decision Making. *The*  
1286 *Journal of Neuroscience* **25**, 10420 (2005).
- 1287 18 Kiani, R. & Shadlen, M. N. Representation of confidence associated with a decision by  
1288 neurons in the parietal cortex. *Science (New York, N.Y.)* **324**, 759-764,  
1289 doi:10.1126/science.1169405 (2009).
- 1290 19 Smith, P. L. & Ratcliff, R. Psychology and neurobiology of simple decisions. *Trends in*  
1291 *Neurosciences* **27**, 161-168, doi:10.1016/j.tins.2004.01.006 (2004).
- 1292 20 Ditterich, J. Evidence for time-variant decision making. *European Journal of*  
1293 *Neuroscience* **24**, 3628-3641, doi:10.1111/j.1460-9568.2006.05221.x (2006).
- 1294 21 Hanks, T., Kiani, R. & Shadlen, M. N. A neural mechanism of speed-accuracy tradeoff in  
1295 macaque area LIP. *eLife* **3**, e02260, doi:10.7554/eLife.02260 (2014).

- 1296 22 Wong, K.-F., Huk, A., Shadlen, M. & Wang, X.-J. Neural circuit dynamics underlying  
1297 accumulation of time-varying evidence during perceptual decision making. *Frontiers in*  
1298 *Computational Neuroscience* **1**, 6 (2007).
- 1299 23 Inagaki, H. K., Fontolan, L., Romani, S. & Svoboda, K. Discrete attractor dynamics  
1300 underlies persistent activity in the frontal cortex. *Nature* **566**, 212-217,  
1301 doi:10.1038/s41586-019-0919-7 (2019).
- 1302 24 Seidemann, E., Meilijson, I., Abeles, M., Bergman, H. & Vaadia, E. Simultaneously  
1303 recorded single units in the frontal cortex go through sequences of discrete and stable  
1304 states in monkeys performing a delayed localization task. *The Journal of Neuroscience*  
1305 **16**, 752 (1996).
- 1306 25 Golub, M. D., Chase, S. M., Batista, A. P. & Yu, B. M. Brain–computer interfaces for  
1307 dissecting cognitive processes underlying sensorimotor control. *Current Opinion in*  
1308 *Neurobiology* **37**, 53-58, doi:<https://doi.org/10.1016/j.conb.2015.12.005> (2016).
- 1309 26 Sussillo, D., Stavisky, S. D., Kao, J. C., Ryu, S. I. & Shenoy, K. V. Making brain–  
1310 machine interfaces robust to future neural variability. *Nature Communications* **7**, 13749,  
1311 doi:10.1038/ncomms13749  
1312 <https://www.nature.com/articles/ncomms13749#supplementary-information> (2016).
- 1313 27 Semedo, J. D., Zandvakili, A., Machens, C. K., Yu, B. M. & Kohn, A. Cortical Areas  
1314 Interact through a Communication Subspace. *Neuron* **102**, 249-259.e244,  
1315 doi:<https://doi.org/10.1016/j.neuron.2019.01.026> (2019).
- 1316 28 Seideman, J. A., Stanford, T. R. & Salinas, E. Saccade metrics reflect decision-making  
1317 dynamics during urgent choices. *Nature Communications* **9**, 2907, doi:10.1038/s41467-  
1318 018-05319-w (2018).

1319 29 Musall, S., Kaufman, M. T., Juavinett, A. L., Gluf, S. & Churchland, A. K. Single-trial  
1320 neural dynamics are dominated by richly varied movements. *bioRxiv*, 308288,  
1321 doi:10.1101/308288 (2019).

1322 30 Aflalo, T. *et al.* Decoding motor imagery from the posterior parietal cortex of a  
1323 tetraplegic human. *Science* **348**, 906 (2015).

1324 31 Andersen, R. A., Hwang, E. J. & Mulliken, G. H. Cognitive Neural Prosthetics. *Annual*  
1325 *Review of Psychology* **61**, 169-190, doi:10.1146/annurev.psych.093008.100503 (2009).

1326 32 Musallam, S., Corneil, B. D., Greger, B., Scherberger, H. & Andersen, R. A. Cognitive  
1327 Control Signals for Neural Prosthetics. *Science* **305**, 258 (2004).

1328 33 Pesaran, B., Musallam, S. & Andersen, R. A. Cognitive neural prosthetics. *Current*  
1329 *Biology* **16**, R77-R80, doi:10.1016/j.cub.2006.01.043 (2006).

1330 34 Benjamini, Y. & Hochberg, Y. *Controlling The False Discovery Rate - A Practical And*  
1331 *Powerful Approach To Multiple Testing*. Vol. 57 (1995).

1332

## 1333 **End notes**

1334

1335 **Supplementary Information** is linked to the online version of the paper.

1336

## 1337 **Acknowledgments**

1338

1339 We thank all other members of the Newsome and Shenoy labs at Stanford University for comments  
1340 on the methods and results throughout the execution of the project. D.P. was supported by the  
1341 Champalimaud Foundation, Portugal, and Howard Hughes Medical Institute. J.R.V. was supported

1342 by Stanford MSTP NIH training grant 4T32GM007365. R.K. was supported by Simons  
1343 Collaboration on the Global Brain grant 542997, Pew Scholarship in Biomedical Sciences,  
1344 National Institutes of Health Award R01MH109180, and a McKnight Scholars Award. J.C.K. was  
1345 supported by NSF graduate research fellowship. P.N. was supported by NIDCD award  
1346 R01DC014034. C.C. was supported by K99NS092972 and 4R00NS092972-03 award from the  
1347 NINDS and supported as a research specialist by the Howard Hughes Medical Institute. J.B. and  
1348 S.F. were supported by the Howard Hughes Medical Institute. K.V.S. was supported by the  
1349 following awards: NIH Director’s Pioneer Award 8DP1HD075623, DARPA-BTO  
1350 “NeuroFAST” award W911NF-14-2-0013, the Simons Foundation Collaboration on the Global  
1351 Brain awards 325380 and 543045, and ONR award N000141812158. W.T.N. and K.V.S. were  
1352 supported by the Howard Hughes Medical Institute.”

1353

## 1354 **Author Contributions**

1355

1356 D.P., J.R.V., R.K., S.F., K.V.S. and W.T.N. designed the experiments. D.P., J.R.V. and S.F. trained  
1357 the animals and collected the data. D.P., J.R.V. and W.T.N. wrote initial draft of the paper. S.I.R,  
1358 D.P. and R.K. performed the surgical procedures. D.P., J.C.K., P.N., C.C. and J.B. implemented  
1359 the real-time decoding setup. D.P., R.K. and C.C. designed, and D.P. and J.R.V implemented, the  
1360 decoder training algorithm to obtain the decoder weights and normalization matrices. D.P. and  
1361 J.R.V. analysed the data. All authors contributed analytical insights and commented on statistical  
1362 tests, discussed the results and implications, and contributed extensively to the multiple subsequent  
1363 drafts of the paper.

1364

1365 **Author Information**

1366

1367 The authors declare no competing interests. Correspondence and requests for materials should be  
1368 addressed to D.P. ([dpeixoto@stanford.edu](mailto:dpeixoto@stanford.edu)), J.R.V. ([jverhein@stanford.edu](mailto:jverhein@stanford.edu)), or W.T.N.  
1369 ([bnewsome@stanford.edu](mailto:bnewsome@stanford.edu)).

1370
